# Supplementary material for: Targeting myeloid derived suppressor cells reverts immune suppression and sensitizes BRAF-mutant papillary thyroid cancer to MAPK inhibitors
Source: PubMed Central journal article supplement (PMC8948260; doi:10.1038/s41467-022-29000-5), 2022-03-24
Supplement: 41467_2022_29000_MOESM1_ESM.pdf [file 41467_2022_29000_MOESM1_ESM.pdf]

## **Supplementary Information**

**Targeting myeloid derived suppressor cells reverts immune suppression and sensitizes  
BRAF-mutant papillary thyroid cancer to MAPK inhibitors**

**Zhang. et al.**

## Supplementary Fig. 1

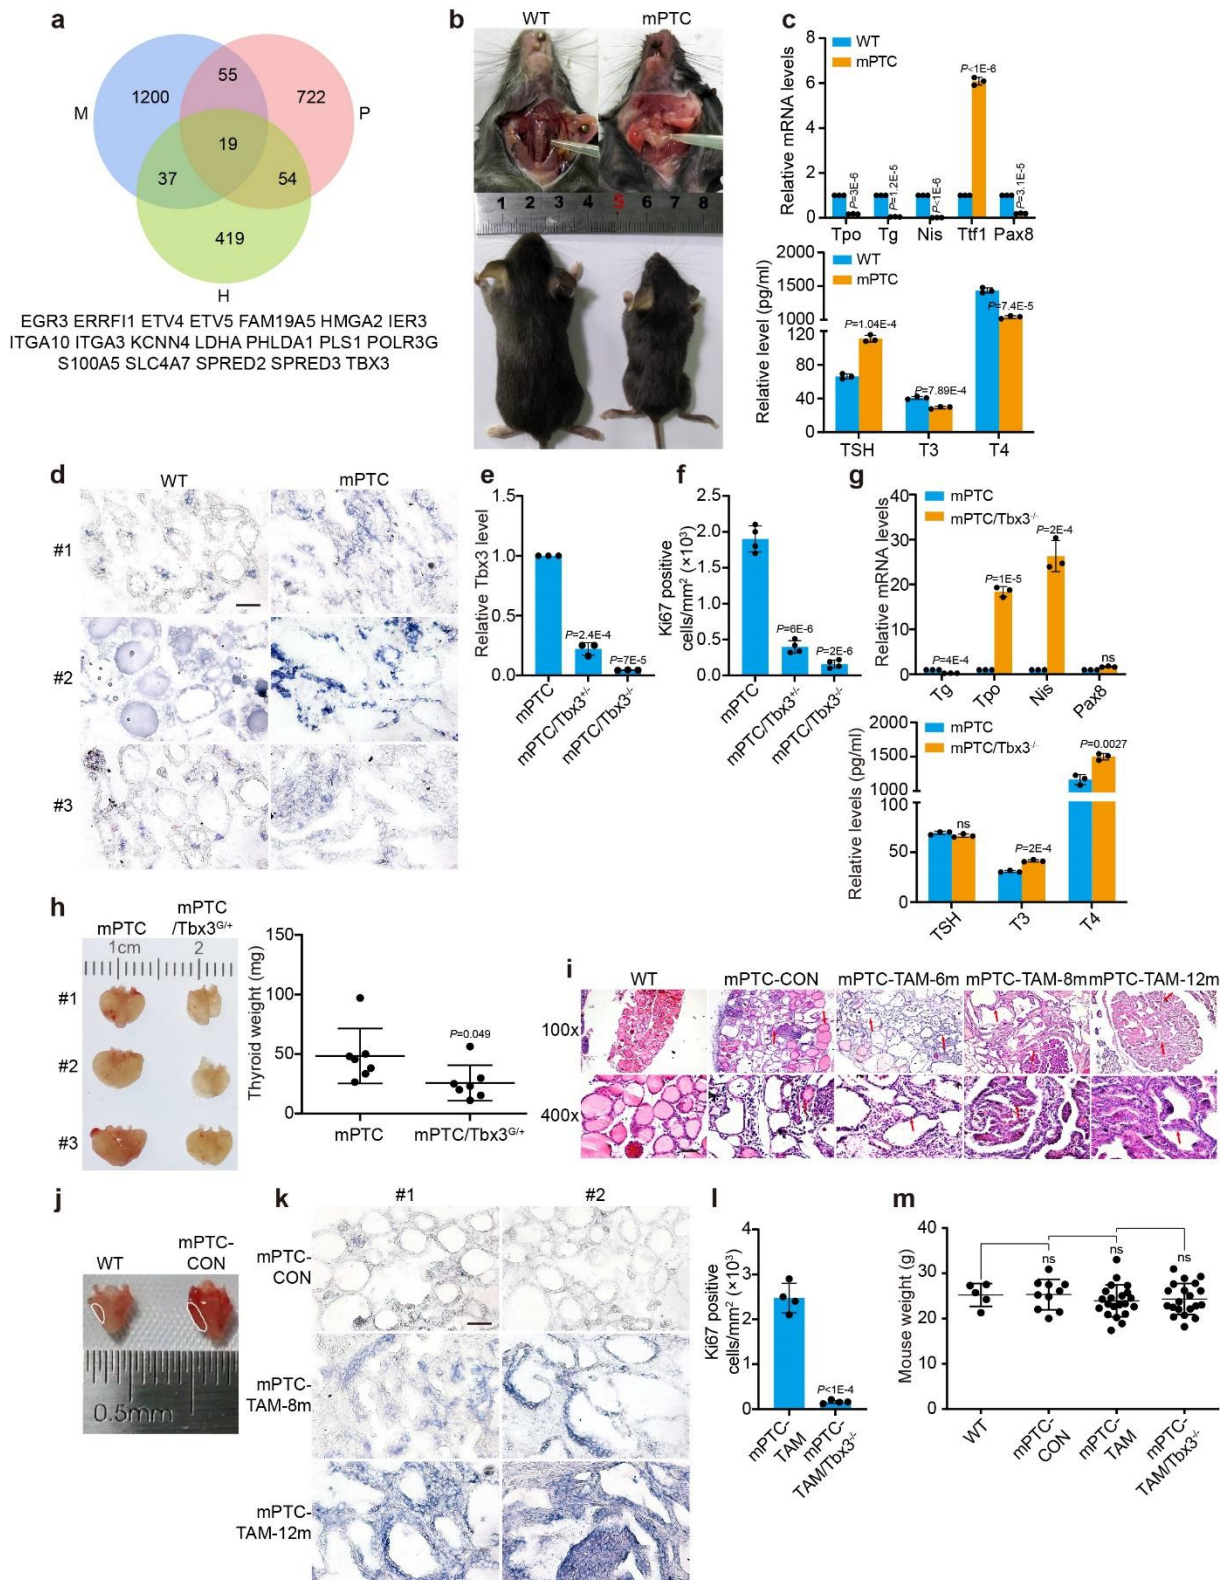

**Supplementary Fig. 1 Loss of Tbx3 represses mPTC progression.** (a) Venn diagram analysis across three groups of genes. M: Down-regulated DEGs in mouse melanoma cells treated with MAPKi (GSE161430); P: Down-regulated DEGs in melanoma patients treated

with MAPKi (GSE75299-patient data part); H: Overlapped down-regulated DEGs from GSE152699 and GSE75299 (cell line data part), referring to human melanoma cell lines treated with MAPKi. **(b)** Gross anatomical images of thyroid tissues from *TPO-cre* (WT) and *TPO-cre; LSL-Braf<sup>V600E</sup>CA* (mPTC) at 5w. Corresponding normal and mPTC mice were shown in lower panel. **(c)** RT-qPCR analysis of thyroid function genes in thyroid tissues from 5w WT and age-matched mPTC littermates. Serum TSH, T3, and T4 levels was measured by ELISA,  $n=3$ . **(d)** Representative in-situs of *Tbx3* in three pairs of thyroid tissues from WT and mPTC littermates at 5w. Scale bars, 50 $\mu$ m. **(e)** RT-qPCR analysis of *Tbx3* in thyroid tissues from WT, mPTC/*Tbx3*<sup>+/-</sup>, and mPTC/*Tbx3*<sup>-/-</sup> mice at 5w. **(f)** The number of positive cells for Ki67 IHC analysis in **Fig. 1e**. **(g)** RT-qPCR analysis of thyroid function genes in thyroid tissues (upper), and ELISA analysis of serum TSH, T3, and T4 levels in 5w mPTC and age-matched mPTC/*Tbx3*<sup>-/-</sup> littermates (lower),  $n=3$ . **(h)** The images representing whole thyroid tissues from mPTC and mPTC/*Tbx3*<sup>G/+</sup> mice at 5w, and the thyroid weight was analyzed,  $n=7$  mPTC,  $n=7$  mPTC/*Tbx3*<sup>G/+</sup>. **(i)** Representative H&E stainings of *TPO-creER* (WT) and *TPO-creER; Braf<sup>V600E</sup>CA* by administration of tamoxifen at 1m (mPTC-TAM) or oil treatment as control (mPTC-CON) for 6m, 8m or 12m. Arrows points to thyroid lobe and papillary architecture. Scale bars, 50  $\mu$ m. **(j)** Images of thyroid tissues from WT and mPTC-CON referring to **Fig. 1j**, the white line marked the thyroid gland. **(k)** Representative in-situs of *Tbx3* in two pairs of thyroid tissues from mPTC-CON, mPTC-TAM-8m, and mPTC-TAM-12m. Scale bars, 50 $\mu$ m. **(l)** The number of positive cells for Ki67 IHC analysis in **Fig. 1i**. **(m)** Mouse weight of WT ( $n=5$ ), mPTC-CON ( $n=10$ ), mPTC-TAM ( $n=21$ ) and mPTC-TAM/*Tbx3*<sup>-/-</sup> ( $n=20$ ) with inducement of tamoxifen for 8m.  $n=3$  biological independent samples (**i**, **k**). Data are shown as the mean  $\pm$  s.d. (**c**, **e-h**, **l**). *P* values were calculated by two-tailed Student's *t* test. ns, no significance. Statistical source data are provided in Source Data.

## Supplementary Fig. 2

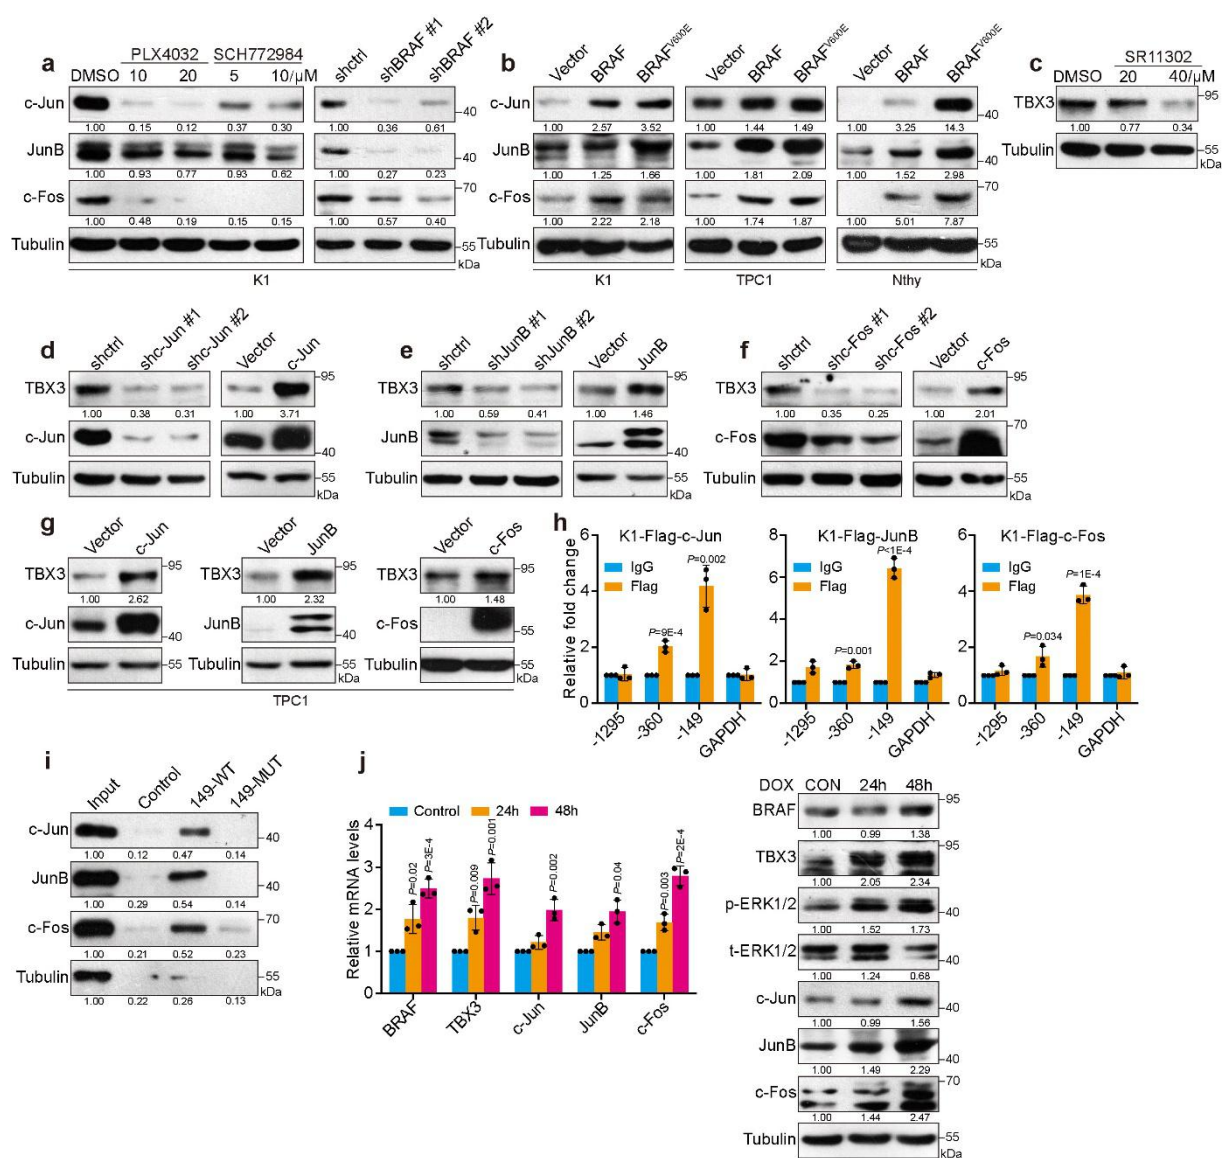

**Supplementary Fig. 2 TBX3 is induced by BRAF/MAPK pathway activation. (a, b)** Western blot of AP-1 factors in PTC or normal thyroid cells treated with PLX4032 or SCH772984 for 24h, or with BRAF knock-down, or with BRAF or BRAFV600E over-expression. **(c)** Western blot of TBX3 in K1 cells treated with AP-1 inhibitor SR11302 for 24h. **(d-f)** Western blot of TBX3 and AP-1 factors in K1 cells with AP-1 knock-down or over-expression. **(g)** Western blot of TBX3 expression in TPC1 cells with AP-1 over-expression. **(h)** Quantitative ChIP (qChIP) analysis with anti-IgG or anti-FLAG for potential AP-1-binding sites in K1 cells stably over-expressed FLAG-tagged AP-1 factors. Results are represented as fold change over control. GAPDH served as a negative control. **(i)** DNA affinity binding

assays were performed using biotin-labeled probe containing -149 site or 149-mut site with K1 nuclear lysates, then analyzed with western blot for AP-1 proteins. **(j)** Expression of TBX3 and AP-1 factors were analysed by RT-qPCR (left) or western blot (right) in TPC1 cells over-expressing BRAF<sup>V600E</sup> induced by Dox for 24h or 48h. Densitometric analyses of western blot were shown **(a-g, i-j)**. Two independent experiments were carried out with similar results for each kind of cells **(a-g)**, and  $n=3$  biological independent samples **(h-j)**. Data are shown as the mean  $\pm$  s.d. **(h, j)**. *P* values were calculated by unpaired two-tailed Student's *t* test **(h, j)**. Uncropped immunoblots and statistical source data are provided in Source Data.

### Supplementary Fig. 3

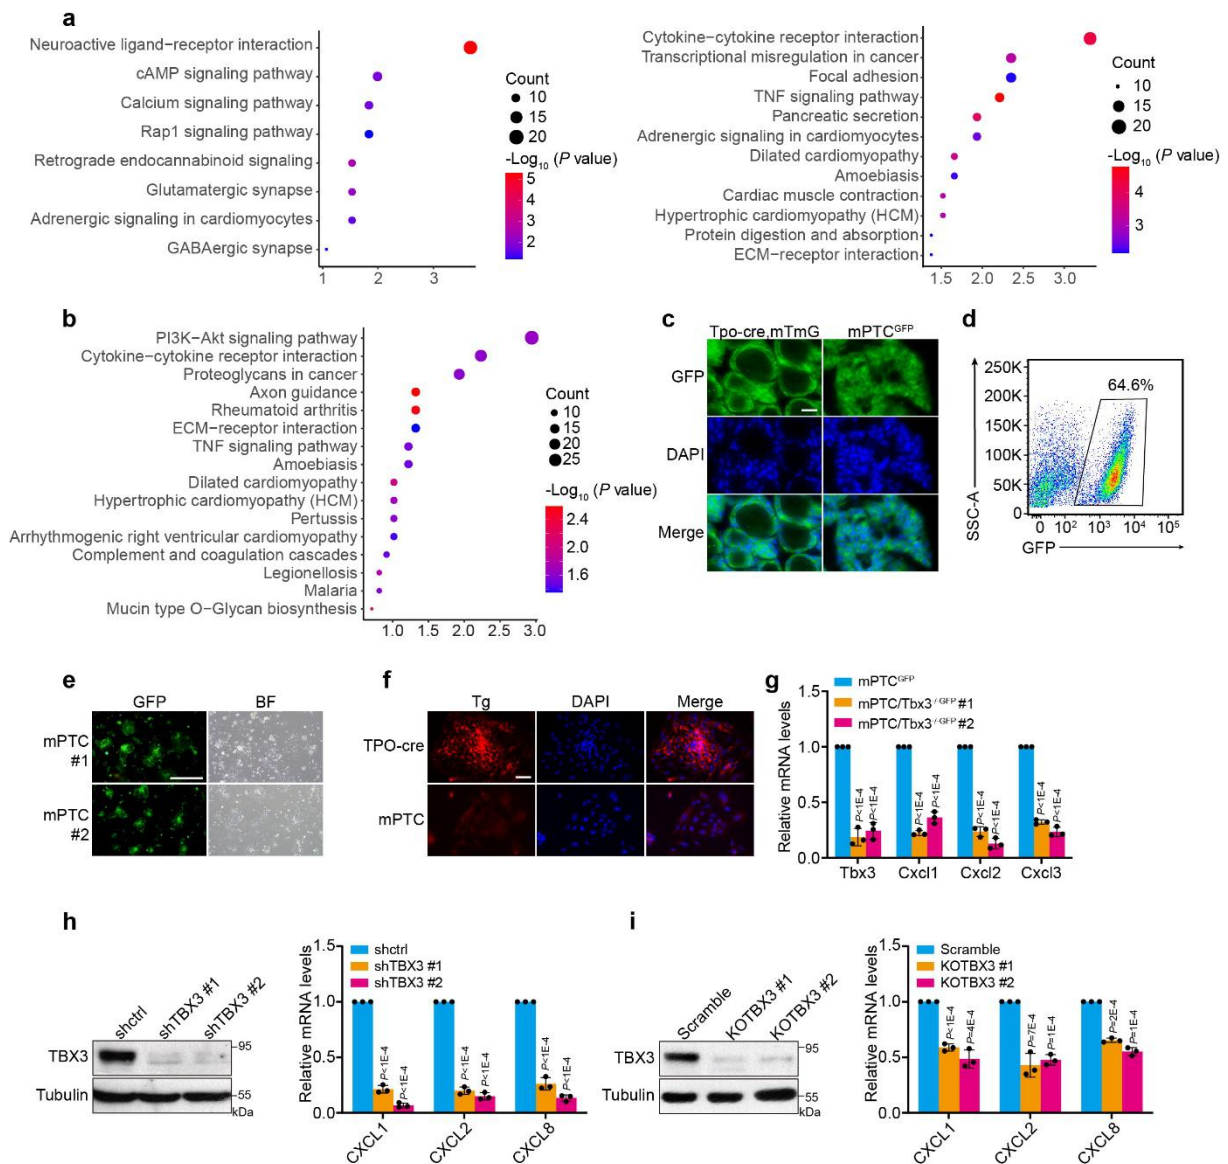

**Supplementary Fig. 3 CXCR2 ligands are repressed upon TBX3 loss.** (a) The KEGG pathway analysis of DEGs according to heatmap (Fig. 3a). The left for up-regulated genes, and the right for down-regulated genes, data were analyzed using DAVID 6.8 website. (b) The KEGG pathway analysis of down-regulated genes in K1 cells with TBX3 knock-down, data were analyzed using DAVID 6.8 website. (c) IF staining of GFP on thyroid gland from *TPO-cre; Rosa26-mTmG* and *TPO-cre; LSL-Braf<sup>V600E</sup>CA; Rosa26-mTmG* (mPTC<sup>GFP</sup>) at 5w. Scale bars, 50 $\mu$ m. (d) Sorting of GFP<sup>+</sup> tumor cells from mPTC<sup>GFP</sup> by flow cytometry. (e) Primary culture of mPTC<sup>GFP</sup> tumor cells 48h post seeding. The pictures were captured in GFP

channel and Bright Field (BF) respectively. Scale bars, 50 $\mu$ m. **(f)** IF staining of Thyroglobulin (Tg) in thyroid gland from *TPO-cre* and mPTC at 5w. Scale bars, 50 $\mu$ m. **(g)** RT-qPCR analysis of *Tbx3*, *Cxcl1*, 2, and *Cxcl3* in GFP<sup>+</sup> cells sorting from mPTC and mPTC/*Tbx3*<sup>-/-</sup> tumors according to **(d)**. **(h, i)** RT-qPCR analysis of *CXCL1*, 2, and *CXCL8* in TPC1 cells with *TBX3* knock-down **(h)**, or K1 cells infected with lentivirus expressing sgRNA targeting *TBX3* **(i)**. A representative of three independent experiments was shown **(c, e-f)**, and  $n=3$  biological independent samples **(g-i)**. Data are shown as the mean  $\pm$  s.d. **(g-i)**. *P* values were calculated by unpaired two-tailed Student's *t* test **(g-i)**. Uncropped immunoblots and statistical source data are provided in Source Data.

# Supplementary Fig. 4

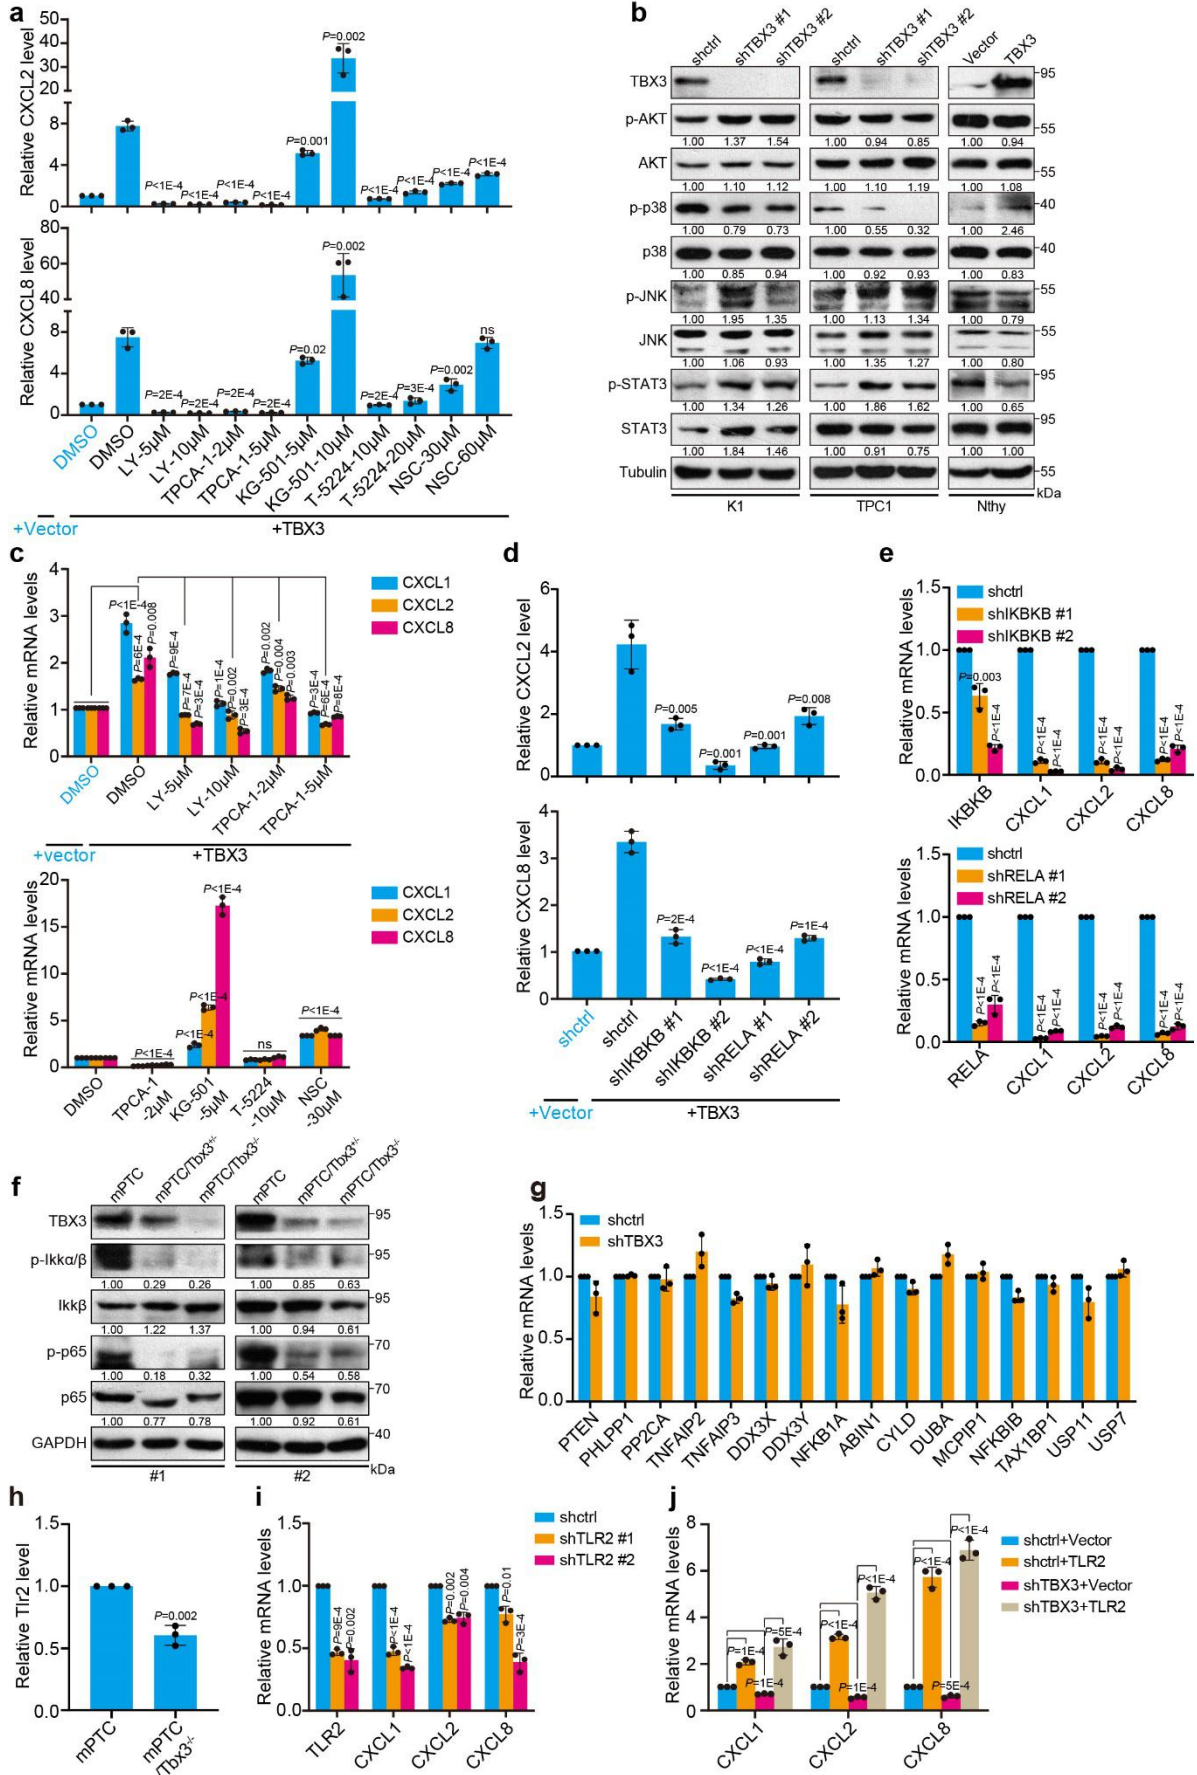



**Supplementary Fig. 4 TBX3 promotes chemokines expression in TLR2-NF- $\kappa$ B pathway dependent manner.** (a) RT-qPCR analysis of CXCL2 and CXCL8 mRNA levels in TBX3 over-expressed Nthy cells treated with small-molecule inhibitors against IKK $\beta$  (LY2409881 (LY), TPCA-1), CREB (KG-501), AP-1 (T-5224) or STAT3 (NSC74859 (NSC)). Comparison between DMSO- or inhibitor-treated TBX3-overexpressed Nthy cells were used for statistical analyses respectively, related to **Fig. 4a**. (b) Western blot of AKT, p38, JNK, or STAT3 pathway members in K1, TPC1 cells with TBX3 knock-down, and Nthy cells with TBX3 over-expression. (c) RT-qPCR analysis of CXCL1, 2 and CXCL8 in TBX3-overexpressed K1 cells treated with LY2409881 or TPCA-1 against IKK $\beta$  (upper) and in K1 cells treated with TPCA-1, KG-501, T-5224 or NSC74859 (lower). (d) RT-qPCR analysis of CXCL2 and CXCL8 in TBX3 over-expressed Nthy cells infected with shRNAs against IKBKB or RELA, the same comparison was showed as in (a), related to **Fig. 4b**. (e) RT-qPCR analysis of CXCL1, 2 and CXCL8 in K1 cells infected with shRNAs against IKBKB or RELA. (f) Western blot of NF- $\kappa$ B pathway members in thyroid gland lysates from mPTC, mPTC/Tbx3<sup>+/-</sup> or mPTC/Tbx3<sup>-/-</sup> littermates. (g) RT-qPCR analysis of gene expression in K1 cells infected with shRNA against TBX3. (h) RT-qPCR analysis of Tlr2 in tumors from mPTC/Tbx3<sup>-/-</sup> compared with mPTC. (i) mRNA expression of TLR2, CXCL1, 2 and CXCL8 in K1 cells infected with shRNAs against TLR2. (j) mRNA expression of CXCL1, 2 and CXCL8 in K1 cells with TBX3 knock-down and/or TLR2 over-expression. Densitometric analyses of western blot were shown (b, f). *n*=3 biological independent samples (a, c-j), and two independent experiments were carried out with similar results for each kind of cells (b). Data are shown as the mean  $\pm$  s.d. (a, c-e, g-j). *P* values were calculated by unpaired two-tailed Student's *t* test (a, c-e, g-j). Uncropped immunoblots and statistical source data are provided in Source Data.

## Supplementary Fig. 5

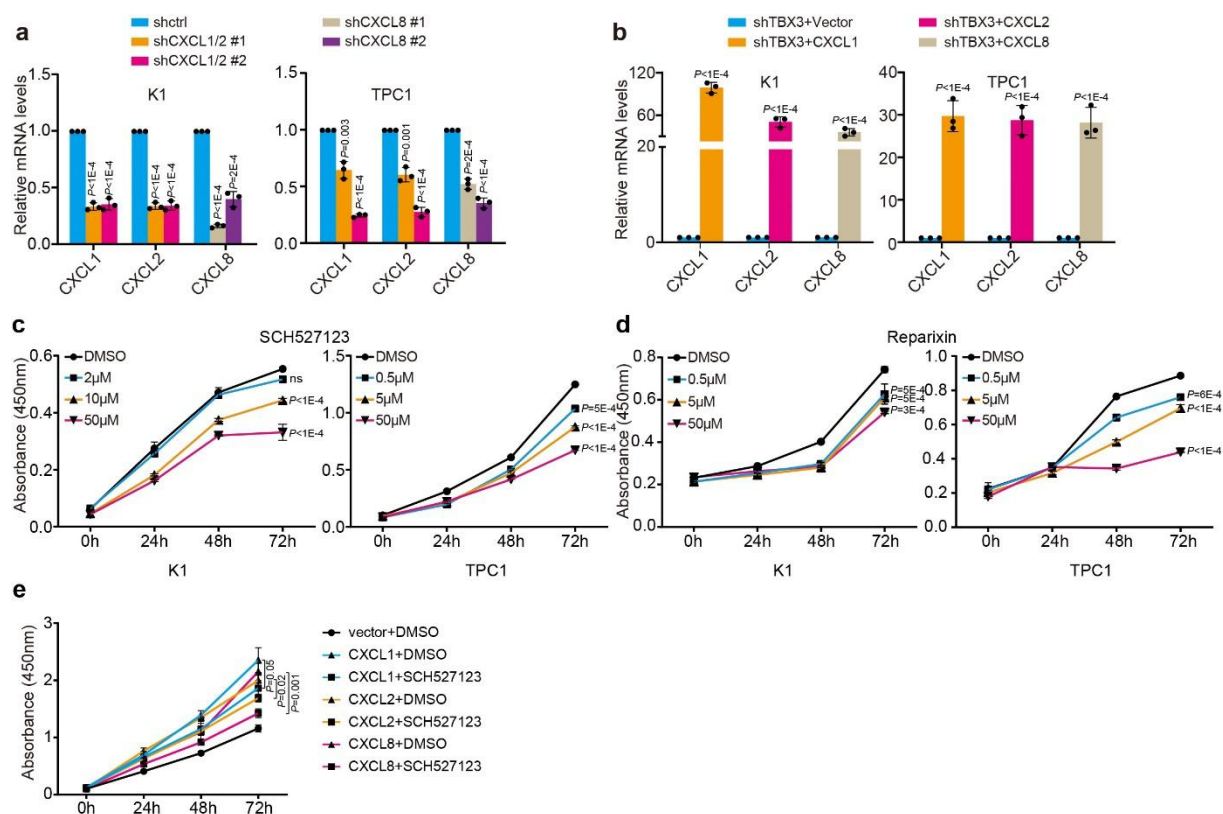

**Supplementary Fig. 5 CXCR2 ligands promote PTC cell proliferation in an autocrine manner.** (a) mRNA levels of CXCL1, 2 and CXCL8 were checked by RT-qPCR in PTC cells infected with lentivirus expressing specific shRNA against CXCL1/2 or CXCL8. (b) mRNA levels of CXCL1, 2 and CXCL8 were checked by RT-qPCR in TBX3 knocked-down PTC cells with or without CXCLs over-expression. (c, d) Effect of CXCR2 blocked by CXCR2 inhibitor SCH527123 (c) or Reparixin (d) on PTC cells proliferation was analyzed. (e) CCK8 assays were performed in K1 cells over-expressing CXCL1, 2 and CXCL8, and treated with DMSO or SCH527123 at a concentration of 50uM.  $n=3$  biological independent samples (a-e). Data are shown as the mean  $\pm$  s.d. (a-e).  $P$  values were calculated by unpaired two-tailed Student's  $t$  test (a-e). Statistical source data are provided in Source Data.

# Supplementary Fig. 6

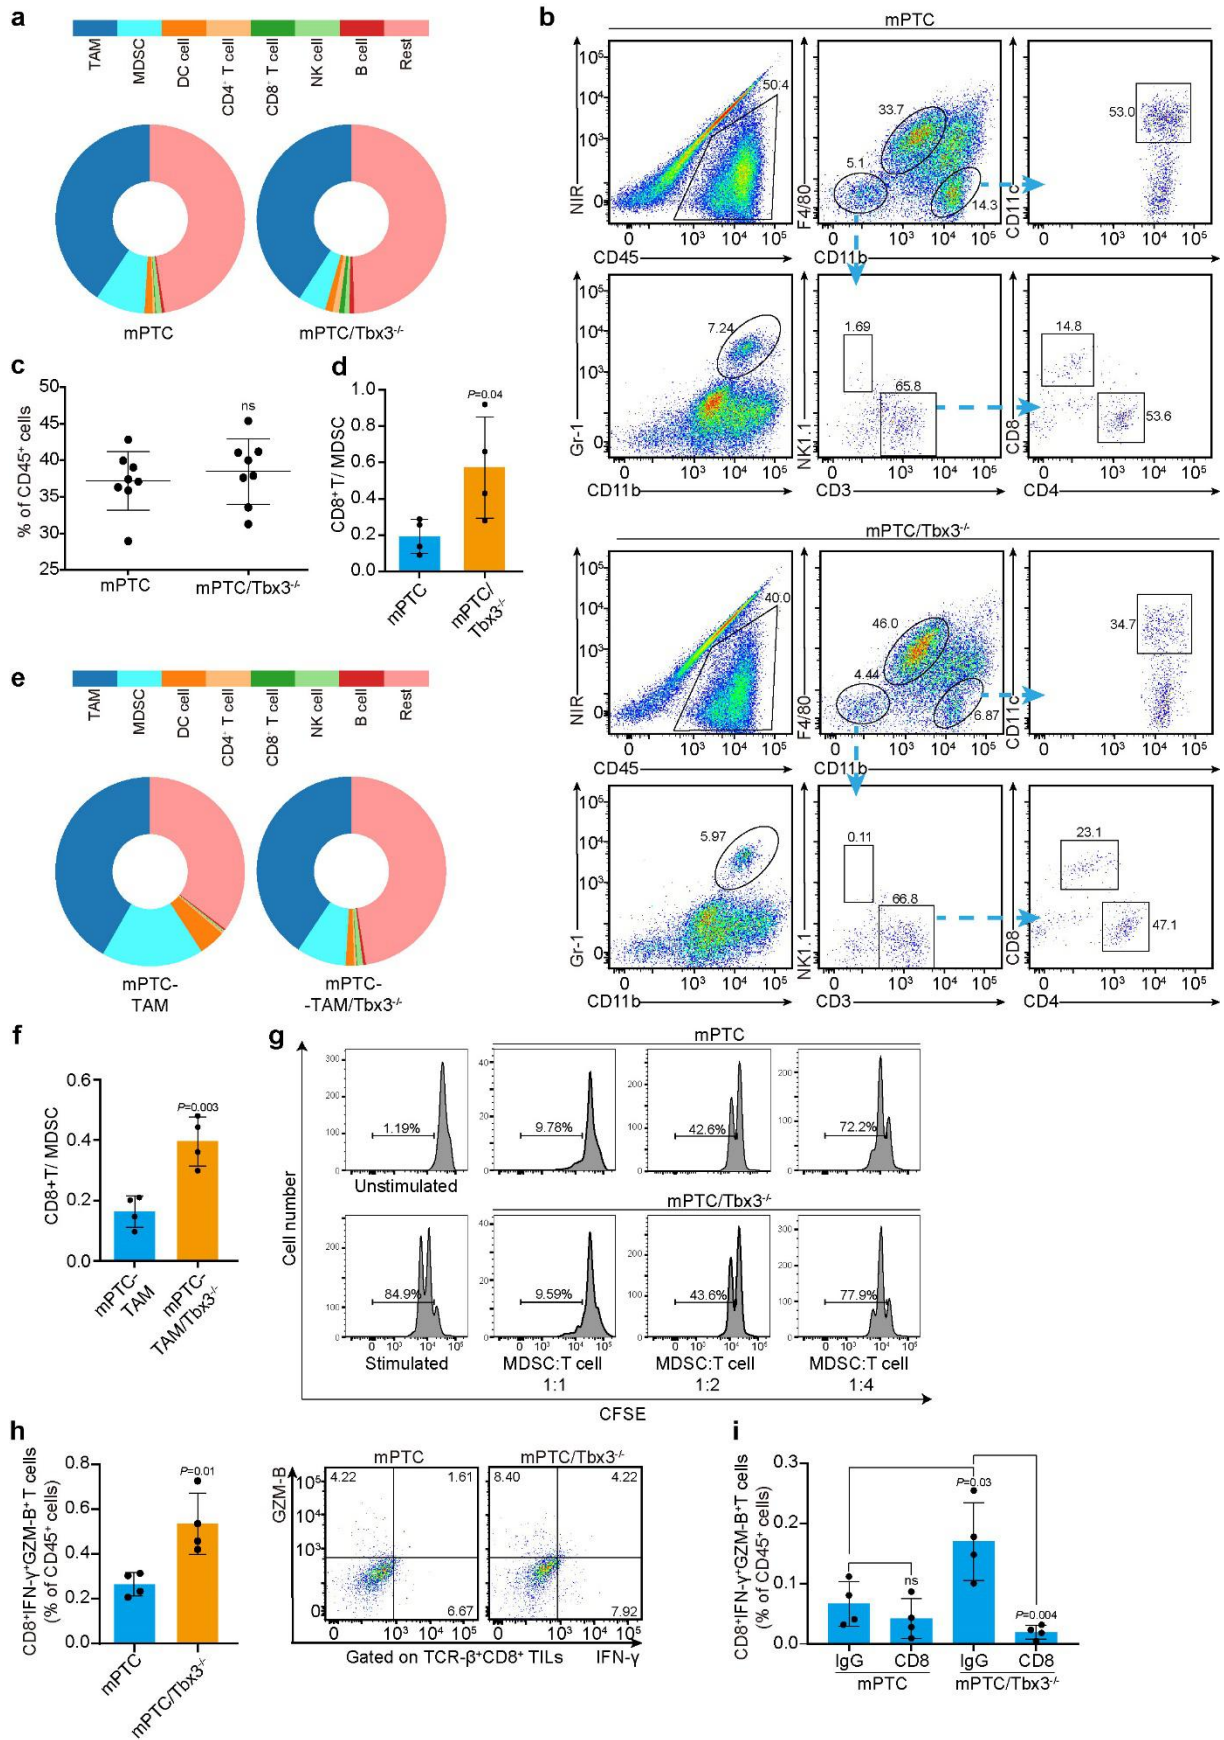

**Supplementary Fig. 6 Loss of Tbx3 in thyroid cancer represses immune-suppression. (a, b)** Quantification of whole leucocyte populations from mPTC and mPTC/Tbx3<sup>-/-</sup> littermates by FlowJo **(a)**. Immune cells were identified as tumor-associated macrophages (TAM) (CD45<sup>+</sup>CD11b<sup>+</sup>F4/80<sup>+</sup>), MDSCs (CD45<sup>+</sup>CD11b<sup>+</sup>Gr-1<sup>+</sup>), dendritic cells (DC) (CD45<sup>+</sup>F4/80<sup>-</sup>CD11b<sup>+</sup>CD11c<sup>+</sup>), CD4<sup>+</sup> T cells (CD45<sup>+</sup>CD3<sup>+</sup>NK1.1<sup>-</sup>CD4<sup>+</sup>CD8<sup>-</sup>), CD8<sup>+</sup> T cells (CD45<sup>+</sup>CD3<sup>+</sup>NK1.1<sup>-</sup>CD4<sup>-</sup>CD8<sup>+</sup>), B cells (CD45<sup>+</sup>CD3<sup>-</sup>CD19<sup>+</sup>), natural killer (NK) cells (CD45<sup>+</sup>CD3<sup>-</sup>NK1.1<sup>+</sup>) **(b)**, *n*=4. **(c)** Percentage of TAM of CD45<sup>+</sup> TILs in mPTC tumors compared with mPTC/Tbx3<sup>-/-</sup> littermates at 5w was analyzed by flow cytometry, *n*=8. **(d)** Relative CD8<sup>+</sup> T cell: total MDSC ratio was plotted, referring to **Fig. 6c**, *n*=4. **(e)** Flow cytometric analysis of whole leucocyte populations from mPTC-TAM compared with mPTC-TAM/Tbx3<sup>-/-</sup> littermates induced with tamoxifen for 8m, *n*=4. **(f)** Relative CD8<sup>+</sup> T cells: total MDSCs ratio was plotted, referring to **Fig. 6f**, *n*=4. **(g)** Flow cytometric analysis of the CFSE-labeled T cell proliferation activated with T-activator CD3/28, co-cultured with MDSCs isolated from mPTC and mPTC/Tbx3<sup>-/-</sup> tumors. The percentage of proliferating CD8<sup>+</sup> T cells is indicated in each panel. A representative of three independent experiments was shown. **(h)** Percentage of IFN- $\gamma$ - and Granzyme B (GZM-B)-expressing, activated CD8<sup>+</sup> T cells of total CD45<sup>+</sup> TILs from mPTC and mPTC/Tbx3<sup>-/-</sup> at 5w was analyzed by FlowJo, *n*=4. **(i)** Percentage of CD8<sup>+</sup>IFN- $\gamma$ <sup>+</sup>GZM-B<sup>+</sup> T cells of total CD45<sup>+</sup> TILs in tumors was analyzed by FlowJo, referring to **Fig. 6g**, *n*=4. Data are shown as the mean  $\pm$  s.d. **(c-d, f, h-i)**. *P* values were calculated by unpaired two-tailed Student's *t* test **(d, f, h-i)**. Statistical source data are provided in Source Data.

## Supplementary Fig. 7

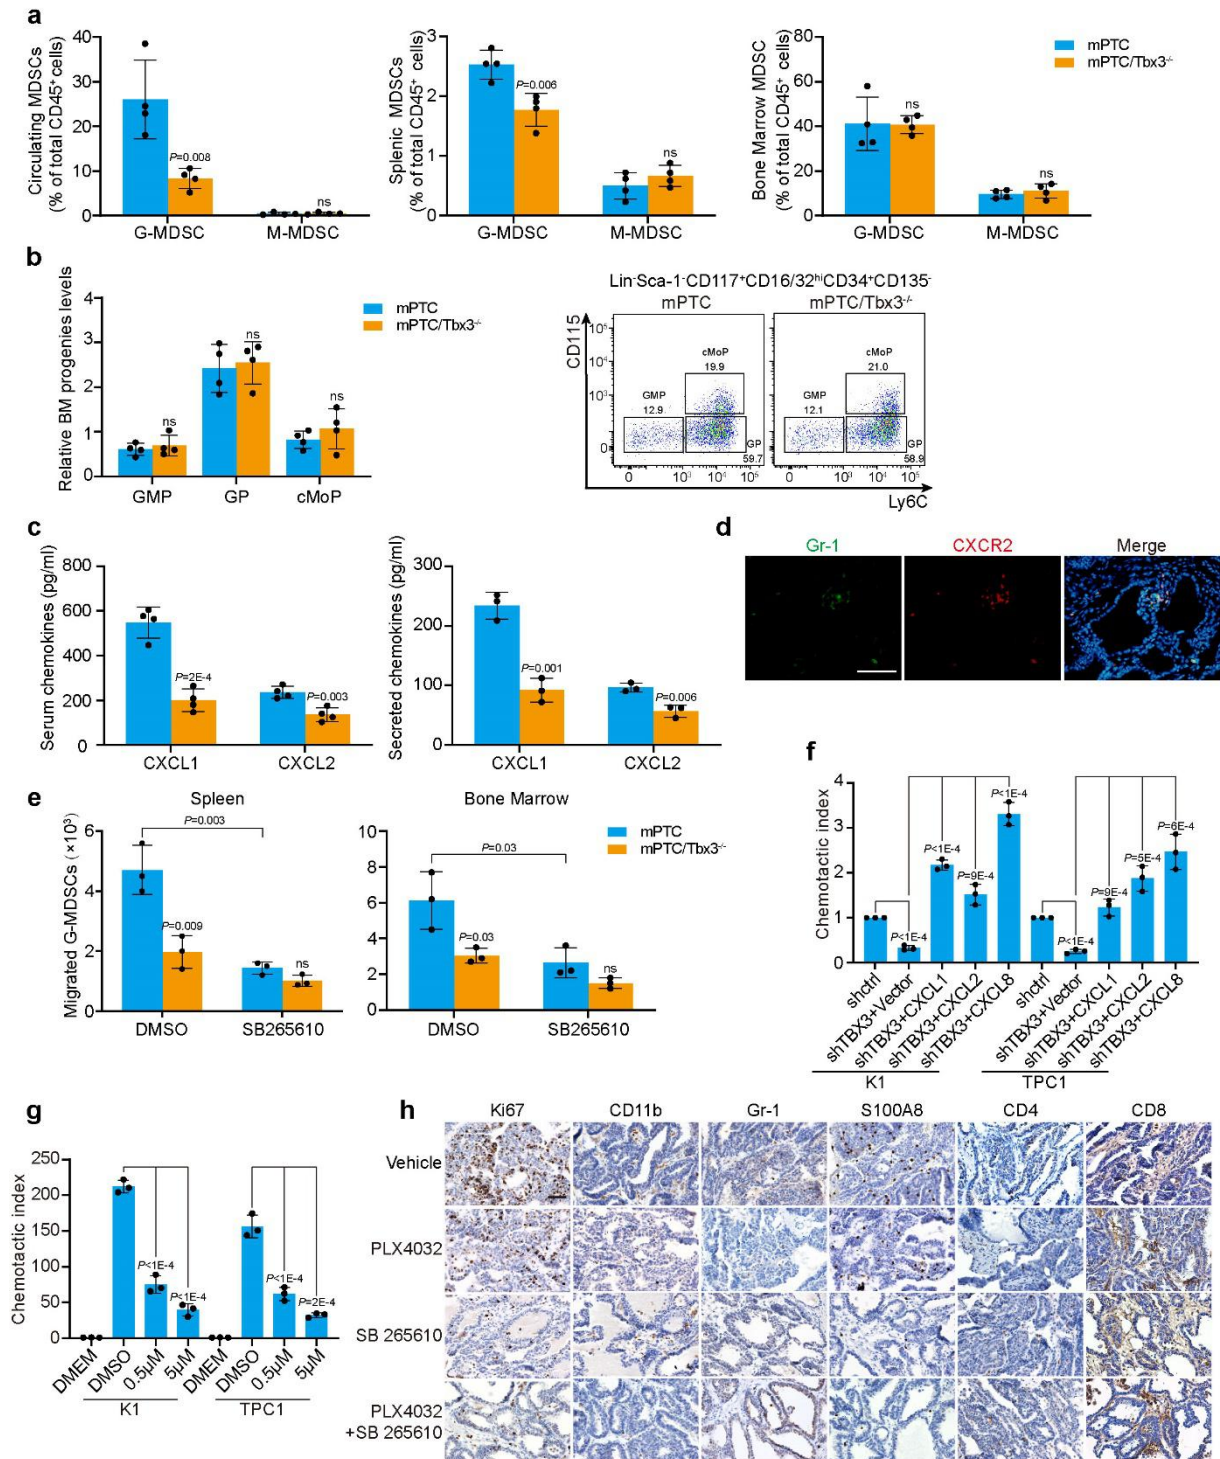

**Supplementary Fig. 7 Tbx3/Cxcr2 ligands axis promotes MDSCs recruitment in thyroid cancer.** (a) Percentage of G-MDSCs and M-MDSCs of total CD45<sup>+</sup> leukocytes in the peripheral blood, spleen and bone marrow (BM) from mPTC and mPTC/Tbx3<sup>-/-</sup> mice was analyzed by FlowJo, *n*=4. (b) Flow cytometric analysis of GMPs (Granulocyte-monocyte

progenitors, Lin<sup>-</sup>Sca-1<sup>-</sup>CD117<sup>+</sup>CD16/32<sup>hi</sup>CD34<sup>+</sup>CD135<sup>-</sup>Ly6C<sup>-</sup>CD115<sup>-</sup>), GPs (Granulocyte progenitors, Lin<sup>-</sup>Sca-1<sup>-</sup>CD117<sup>+</sup>CD16/32<sup>hi</sup>CD34<sup>+</sup>CD135<sup>-</sup>Ly6C<sup>+</sup>CD115<sup>-</sup>) and cMoPs (Common monocyte progenitor, Lin<sup>-</sup>Sca-1<sup>-</sup>CD117<sup>+</sup>CD16/32<sup>hi</sup>CD34<sup>+</sup>CD135<sup>-</sup>Ly6C<sup>+</sup>CD115<sup>+</sup>) of BM progenitors from mPTC and mPTC/Tbx3<sup>-/-</sup> mice at age of 5w according to the sorting strategy of Zhaoyuan Liu (Cell, 2019)<sup>1</sup>, *n*=4. (c) Levels of CXCL1 and CXCL2 in blood (left, *n*=4) and supernatants of primary tumor cells (right, *n*=4) were measured by ELISA. (d) Expression and localization of Gr-1 and CXCR2 in PTC tissues were analyzed by IF staining. Scale bars, 100μm. (e) Migration of spleen and BM G-MDSCs toward conditioned medium from cultured primary mPTC and mPTC/Tbx3<sup>-/-</sup> cells, which were treated with SB265610 at 5μM, was evaluated through 3mm-transwell migration assay. *n*=3. (f) Neutrophil chemotaxis through 3mm-transwell migration assay was detected in response to the conditioned media from TBX3 knock-down PTC cells with Vector and CXCLs over-expression. (g) Neutrophil chemotaxis was detected in response to the conditioned media from PTC cells treated SCH527123 at 0.5 and 5μM. (h) Representative images of IHC staining in four groups of mPTC were shown, referring to **Fig. 6h**. Scale bars, 50μm. A representative of three independent experiments was shown (d). *n*=3 biological independent samples (f, g). Data are shown as the mean ± s.d (a, c, e-g). *P* values were calculated by unpaired two-tailed Student's *t* test (a, c, e-g). Statistical source data are provided in Source Data.

## Supplementary Fig. 8

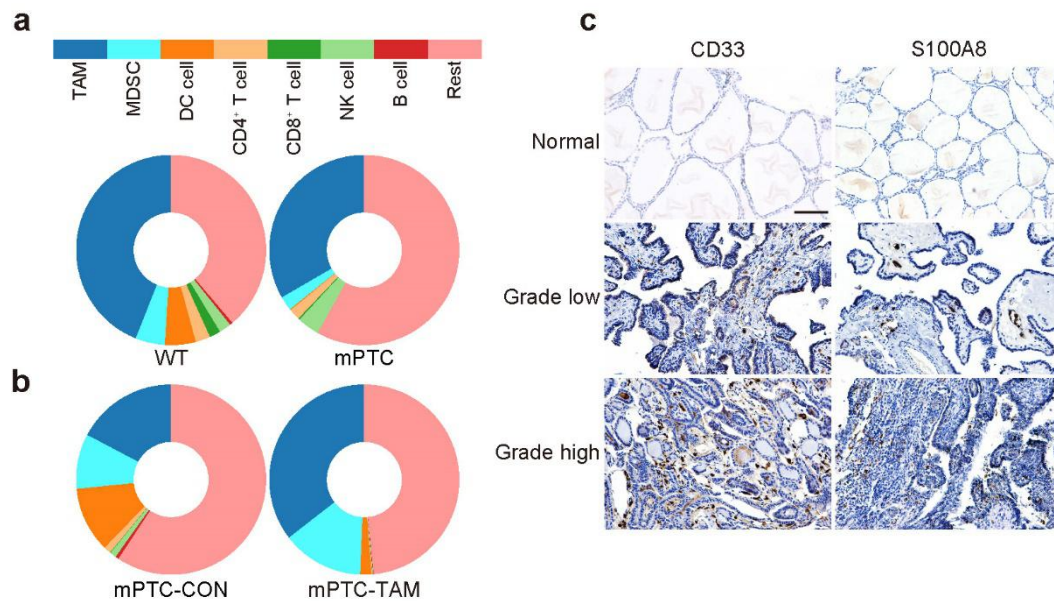

**Supplementary Fig. 8 The infiltration of MDSCs increases in PTC.** (a) Quantification of whole leucocyte populations in thyroid glands from mPTC and control littermates by FlowJo,  $n=5$ . (b) Quantification of whole leucocyte populations in thyroid glands from mPTC-CON and mPTC-TAM induced with oil or tamoxifen for 8m by FlowJo,  $n=4$ . (c) IHC staining of CD33 and S100A8 on PTC samples (histological Grades low [I, II] and Grades high [III and IV]) paired with adjacent normal tissues. A representative of three independent experiments was shown. Scale bars, 100µm. Statistical source data are provided in Source Data.

## Supplementary Fig. 9

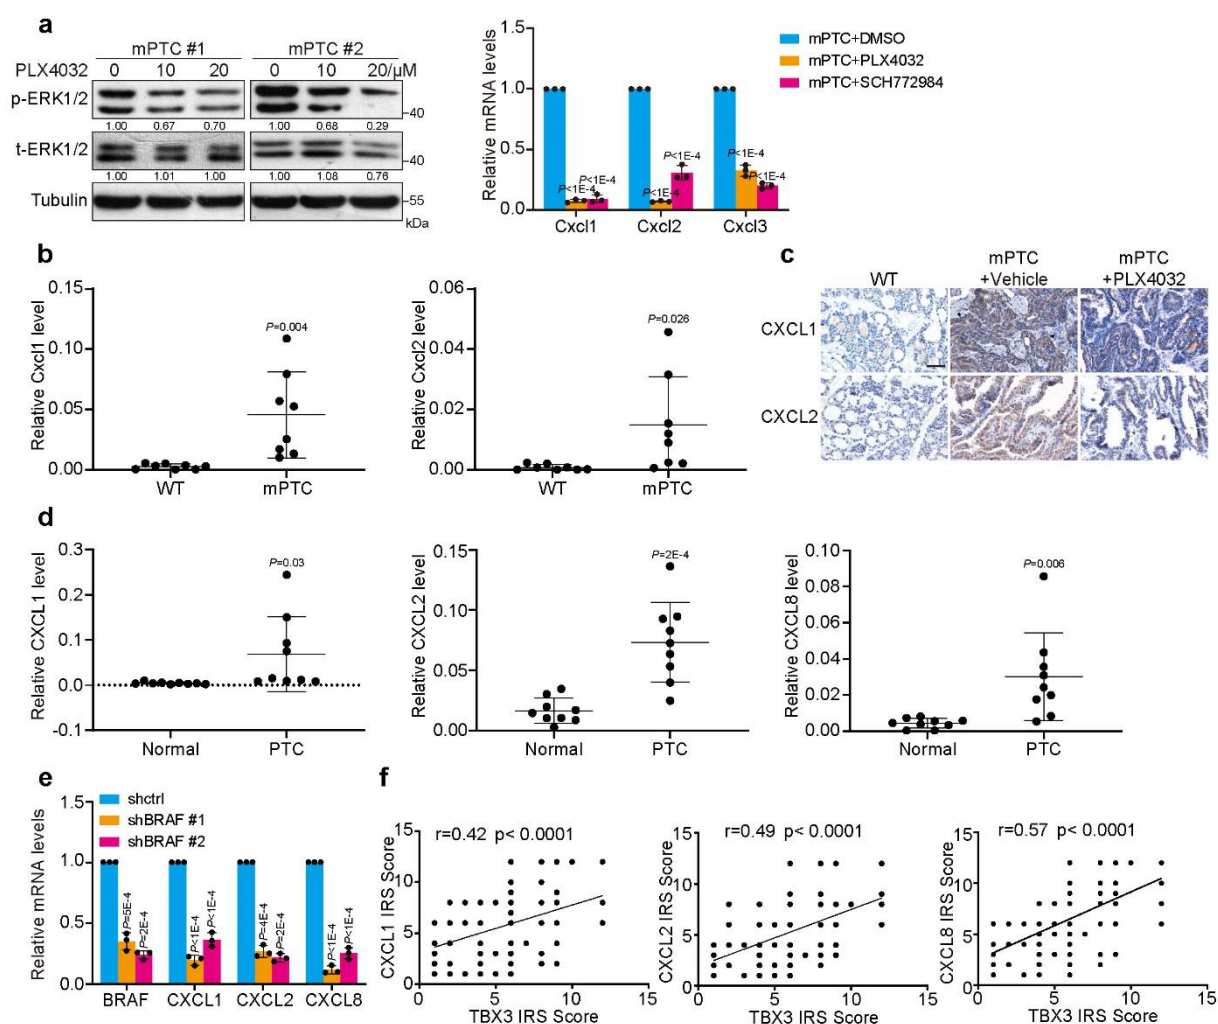

### Supplementary Fig. 9 CXCR2 ligands are highly expressed in BRAF<sup>V600E</sup> mutation PTC.

(a) Expression of p-ERK1/2 and ERK1/2 in mPTC<sup>GFP</sup> tumor cells treated with PLX4032 was checked by western blot (left), and the levels of Cxcl1, Cxcl2 and Cxcl3 in mPTC<sup>GFP</sup> tumor cells treated with PLX4032 or SCH772984 were checked by RT-qPCR (right). (b) RT-qPCR analysis of mRNA levels of Cxcl1 and Cxcl2 in thyroid glands from mPTC ( $n=8$ ) and age-matched wild-type littermates ( $n=8$ ) at 5w. (c) IHC analysis of CXCL1 and CXCL2 in WT and mPTC treated with PLX4032 in **Fig. 6h**. Scale bars, 50 $\mu$ m. (d) RT-qPCR analysis mRNA levels of CXCL1, 2 and CXCL8 in human PTC tissues ( $n=9$ ) and paracancerous tissues (Normal,  $n=9$ ). (e) Levels of CXCLs in K1 cells with BRAF knockdown were checked by RT-qPCR. (f) IHC results from **Fig. 8e** were used to analyze the correlation coefficient between



TBX3 and CXCL1, CXCL2 and CXCL8.  $n=3$  biological independent samples (**a**, **c**, **e**). Data are shown as the mean  $\pm$  s.d (**a-b**, **d-f**).  $P$  values were calculated by unpaired two-tailed Student's  $t$  test (**a-b**, **d-f**). Uncropped immunoblots and statistical source data are provided in Source Data.

**Supplementary Table 1. List of shRNA sequences**

|              |                       |
|--------------|-----------------------|
| shctrl       | CCTAAGGTTAAGTCGCCCTCG |
| shTBX3 #1    | GCGAATGTTTCCTCCATTTAA |
| shTBX3 #2    | GCTGATGACTGTCGTTATAAA |
| shBRAF #1    | TCTGGAGGCCTATGAAGAATA |
| shBRAF #2    | GACCTCAAGAGTAATAATATA |
| shc-Jun #1   | AGATGGAAACGACCTTCTATG |
| shc-Jun #2   | GAAAGTCATGAACCACGTTAA |
| shJunB #1    | ACGACTACAAACTCCTGAAAC |
| shJunB #2    | TCATACACAGCTACGGGATAC |
| shc-Fos #1   | TCTGCTTTGCAGACCGAGATT |
| shc-Fos #2   | GCGGAGACAGACCAACTAGAA |
| shCXCL1/2 #1 | AGATGCTGAACAGTGACAAAT |
| shCXCL1/2 #2 | CGAAGTCATAGCCCACTCAA  |
| shCXCL8 #1   | ACTTAGATGTCAGTGCATAAA |
| shCXCL8 #2   | TATCCAGAACATACTTATATG |
| shIKBKB #1   | CCAGCCAAGAAGAGTGAAGAA |
| shIKBKB #2   | GCTGGTTCATATCTTGAACAT |
| shRELA #1    | CGGATTGAGGAGAAACGTAAA |
| shRELA #2    | CCTGAGGCTATAACTCGCCTA |
| shTLR2 #1    | TTTGATGACTGTACCCTTAAT |
| shTLR2 #2    | ACTTATCCAGCACACGAATAC |

**Supplementary Table 2. List of qPCR primers**

| <b>Human gene</b> | <b>Strand</b> | <b>Sequence</b>         |
|-------------------|---------------|-------------------------|
| TBX3              | F             | TTTGAAGACCATGGAGCCCG    |
| TBX3              | R             | ACATTCGCCTTCCCGACTTG    |
| BRAF              | F             | AGACGGGACTCGAGTGATGA    |
| BRAF              | R             | AACTGCTGAGGTGTAGGTGC    |
| c-Jun             | F             | GTGCCGAAAAGGAAGCTGG     |
| c-Jun             | R             | CTGCGTTAGCATGAGTTGGC    |
| JunB              | F             | GTCAAAGCCCTGGACGATCT    |
| JunB              | R             | TTGGTGTAACGGGAGGTGG     |
| c-Fos             | F             | GGGGCAAGGTGGAACAGTTA    |
| c-Fos             | R             | AGGTTGGCAATCTCGGTCTG    |
| FosB              | F             | GCTGCAAGATCCCCTACGAAG   |
| FosB              | R             | ACGAAGAAGTGTACGAAGGGTT  |
| CXCL1             | F             | GCGCCCAAACCGAAGTC       |
| CXCL1             | R             | TGCAGGATTGAGGCAAGCTT    |
| CXCL2             | F             | CTGCGCCCAAACCGAAGTCATA  |
| CXCL2             | R             | TCAGTTGGATTTGCCATTTT    |
| CXCL3             | F             | CCCAAACCGAAGTCATAGCC    |
| CXCL3             | R             | AGTTCCCCACCCTGTCATTT    |
| CXCL8             | F             | CCTGATTTCTGCAGCTCTGT    |
| CXCL8             | R             | AACTTCTCCACAACCCTCTG    |
| IL-10             | F             | TCAAGGCGCATGTGAACTCC    |
| IL-10             | R             | GATGTCAAACCTCACTCATGGCT |
| Oncostatin        | F             | CACAGACTGGCCGACTTAGAG   |
| Oncostatin        | R             | AGTCCTCGATGTTTCAGCCA    |
| GCSF              | F             | GCTGCTTGAGCCAACCTCCATA  |
| GCSF              | R             | GAACGCGGTACGACACCTC     |
| GM-CSF            | F             | TCCTGAACCTGAGTAGAGACAC  |
| GM-CSF            | R             | TGCTGCTTGTAGTGGCTGG     |
| CCL-7             | F             | ATCCCTAAGCAGAGGCTGGA    |
| CCL-7             | R             | GTCCTGGACCCACTTCTGTG    |
| TGFB1             | F             | GGCCAGATCCTGTCCAAGC     |
| TGFB1             | R             | GTGGGTTTCCACCATTAGCAC   |
| PDGF-BB           | F             | CTCGATCCGCTCCTTTGATGA   |
| PDGF-BB           | R             | CGTTGGTGCGGTCTATGAG     |
| PTEN              | F             | GCTATGGGATTTCTGCAG      |
| PTEN              | R             | CTAGCTGTGGTGGGTTATGG    |
| PHLPP1            | F             | GTCAAAGCCCTGGACGATCT    |
| PHLPP1            | R             | TTGGTGTAACGGGAGGTGG     |
| PP2CA             | F             | GCCTACAAGAAGTTCCCCATGAG |
| PP2CA             | R             | TCTGCGAGAAGGCTAAAGA     |
| TNFAIP2           | F             | GCTGACGCGGCTTTCCCG      |
| TNFAIP2           | R             | GCTCCTCCTCGCTCACACCG    |
| TNFAIP3           | F             | TCCTCAGGCTTTGTATTTGAGC  |
| TNFAIP3           | R             | TGTGTATCGGTGCATGGTTTA   |
| DDX3X             | F             | CCGCAAACAATACCCAATCT    |
| DDX3X             | R             | CCACGCAAGGACGAACCTCTA   |

|                   |               |                         |
|-------------------|---------------|-------------------------|
| DDX3Y             | F             | GGAACAGAGAAGCATCTAAAGG  |
| DDX3Y             | R             | CATCATAGTCACTCCGTCCA    |
| NFKB1A            | F             | GCCGCTCCTTCTTCAGCC      |
| NFKB1A            | R             | AGCCACAGCAGTCCGTG       |
| ABIN1             | F             | CTAGTGTGACGGCAGGTAAGG   |
| ABIN1             | R             | GCTGCTTCATGGACCGGAA     |
| CYLD              | F             | TTCACTGACGGGGTGTACCA    |
| CYLD              | R             | CAGGACCTGCGTAATCACTTTC  |
| DUBA              | F             | GGTTGTGCGAAAGCATTGCAT   |
| DUBA              | R             | ACCTCCACAGGACGGTTGT     |
| MCPIP1            | F             | ACGGGATCGTGGTTTCCAAC    |
| MCPIP1            | R             | TGGCTTCTTACGCAGGAAGTT   |
| NFKBIB            | F             | GCTGACCTTGACAAACCGGA    |
| NFKBIB            | R             | GCCGGATTTCTCGTCCTCG     |
| TAX1BP1           | F             | AAGAAACAGCACAACCTTCGAGA |
| TAX1BP1           | R             | TGGATGTAGCATCACTGAACCT  |
| USP11             | F             | TATAAGCAGTGGGAGGCATACG  |
| USP11             | R             | ATGACCTTGCCTTCAATGGGT   |
| USP7              | F             | GGAAGCGGGAGATACAGATGA   |
| USP7              | R             | AAGGACCGACTCACTCAGTCT   |
| IKBKB             | F             | GGAAGTACCTGAACCAGTTTGAG |
| IKBKB             | R             | GCAGGACGATGTTTTCTGGCT   |
| RELA              | F             | CTATAGAAGAGCAGCGTGGGG   |
| RELA              | R             | TCACTCGGCAGATCTTGAGC    |
| TLR2              | F             | TTATCCAGCACACGAATACACAG |
| TLR2              | R             | AGGCATCTGGTAGAGTCATCAA  |
| Ki67              | F             | TGAGCCTGTACGGCTAAAACA   |
| Ki67              | R             | GGCCTTGGAATCTTGAGCTTT   |
| GAPDH             | F             | CCTGTTTCGACAGTCAGCCG    |
| GAPDH             | R             | CGACCAAATCCGTTGACTCC    |
| <b>Mouse gene</b> | <b>Strand</b> | <b>sequence</b>         |
| Tbx3              | F             | CTGGCAATGGCAGGAGAGAA    |
| Tbx3              | R             | GAGACAGCAGGAGAGGATGC    |
| Tlr2              | F             | GCAAACGCTGTTCTGCTCAG    |
| Tlr2              | R             | AGGCGTCTCCCTCTATTGTATT  |
| Cxcl1             | F             | CCTATCGCCAATGAGCTGCG    |
| Cxcl1             | R             | CCTCGCGACCATTCTTGAGT    |
| Cxcl2             | F             | GAAGACCCTGCCAAGGGTTG    |
| Cxcl2             | R             | AGGCAAACCTTTTGACCGCC    |
| Cxcl3             | F             | GAACACCCTACCAAGGGTTGA   |
| Cxcl3             | R             | TCAGCTGGACTTGCCGC       |
| Tnfa              | F             | GTAGCCCACGTCGTAGCAA     |
| Tnfa              | R             | TAGCAAATCGGCTGACGGTG    |
| Tnfβ              | F             | CACACGAGGTCCAGCTCTTT    |
| Tnfβ              | R             | GTAGATGGGAGATGCCGTCG    |
| Il-1α             | F             | GAGCCGGGTGACAGTATCAG    |
| Il-1α             | R             | ACTTCTGCCTGACGAGCTTC    |
| Il1r2             | F             | GTTTCTGCTTTCACCACTCCA   |
| Il1r2             | R             | GAGTCCAATTTACTCCAGGTCAG |

|                  |               |                         |
|------------------|---------------|-------------------------|
| Ccl-7            | F             | ATAGCCGCTGCTTTCAGCAT    |
| Ccl-7            | R             | CTCGACCCACTTCTGATGGG    |
| Tgfβ-1           | F             | AGCTGCGCTTGCAGAGATTA    |
| Tgfβ-1           | R             | AGCCCTGTATTCCGTCTCCT    |
| Gm-csf           | F             | CTCACCCATCACTGTCACCC    |
| Gm-csf           | R             | AAATTGCCCCGTAGACCCTG    |
| S100a8           | F             | AAATCACCATGCCCTCTACAAG  |
| S100a8           | R             | CCCCTTTTATCACCATCGCAA   |
| S100a9           | F             | ATACTCTAGGAAGGAAGGACACC |
| S100a9           | R             | TCCATGATGTCATTTATGAGGGC |
| Tpo              | F             | TGACTTCCAGGAGCACACAG    |
| Tpo              | R             | GCAAGTTCAGTGATGCCAGA    |
| Tg               | F             | TGTCCCACCAAGTGTGAAAA    |
| Tg               | R             | CCAAGGAAAGCTTGTTTCAGC   |
| Nis              | F             | GCTCAGTCTCGCTCAAACC     |
| Nis              | R             | CGTGTGACAGGCCACATAAC    |
| Ttfl             | F             | TCCAGCCTATCCCATCTGAACT  |
| Ttfl             | R             | CAAGCGCATCTCACGTCTCA    |
| Pax8             | F             | CAGAAGGCGTTTGTGACAATGA  |
| Pax8             | R             | TGCACTTTGGTCCGGATGAT    |
| Igfbp3           | F             | CACACCGAGTGACCGATTCC    |
| Igfbp3           | R             | GTGTCTGTGCTTTGAGACTCAT  |
| Cdkn1c           | F             | CGAGGAGCAGGACGAGAATC    |
| Cdkn1c           | R             | GAAGAAGTCGTTTCGCATTGGC  |
| Cdkn2c           | F             | GGGGACCTAGAGCAACTTACT   |
| Cdkn2c           | R             | AAATTGGGATTAGCACCTCTGAG |
| Mmp9             | F             | CTGGACAGCCAGACACTAAAG   |
| Mmp9             | R             | CTCGCGGCAAGTCTTCAGAG    |
| Klf9             | F             | GCCGCCTACATGGACTTCG     |
| Klf9             | R             | GGTCACCGTGTTTCCTTGGT    |
| Met              | F             | GTGAACATGAAGTATCAGCTCCC |
| Met              | R             | TGTAGTTTGTGGCTCCGAGAT   |
| Six4             | F             | CCACGGTTTTTCCCTGACCC    |
| Six4             | R             | GGTTGCATAGTTAGTGTTGCTGA |
| Gapdh            | F             | AGGTCGGTGTGAACGGATTTG   |
| Gapdh            | R             | TGTAGACCATGTAGTTGAGGTCA |
| <b>ChIP-qPCR</b> | <b>Strand</b> | <b>sequence</b>         |
| GAPDH            | F             | GAAGGCTGGGGCTCATTT      |
| GAPDH            | R             | CAGGAGGCATTGCTGATGAT    |
| -149             | F             | GTTACAGTTTCCGACACCTT    |
| -149             | R             | CCTCTTGATTGGCTCTTTGA    |
| -360             | F             | GGAGTGCAAGAGAGGCGAGC    |
| -360             | R             | CTCGCTCGCTCTGGTTCAGC    |
| -1295            | F             | TGGGTGCACAGCACAGGGTAA   |
| -1295            | R             | AAAGCGAGCACAGCGAGAGA    |

## References

- 1 Liu, Z. et al. Fate Mapping via Ms4a3-Expression History Traces Monocyte-Derived Cells. *Cell* **178**, 1509-1525 e1519 (2019).
