# Supplementary material for: Targeting myeloid derived suppressor cells reverts immune suppression and sensitizes BRAF-mutant papillary thyroid cancer to MAPK inhibitors
Source: PubMed Central journal article supplement (PMC8948260; doi:10.1038/s41467-022-29000-5), 2022-03-24
Supplement: 41467_2022_29000_MOESM7_ESM.pdf [file 41467_2022_29000_MOESM7_ESM.pdf]

**Title: Supplementary Data 1.**

**Description:** List of the overlapped DEGs from the RNA-sequencing analysis data of human and mouse.

**Title: Supplementary Data 2.**

**Description:** List of the chemokines from analysis of antibody array on K1 and TPC1 cells with TBX3 knock-down.

**Title: Supplementary Data 3.**

**Description:** List of the overlapped DEGs from the RNA-sequencing analysis data of PTC and breast cancer cells.
