# Supplementary material for: Targeting myeloid derived suppressor cells reverts immune suppression and sensitizes BRAF-mutant papillary thyroid cancer to MAPK inhibitors
Source: Nat Commun. 2022 Mar 24;13:1588. doi: 10.1038/s41467-022-29000-5 (PMC8948260; doi:10.1038/s41467-022-29000-5)
Supplement: Supplementary file 4 — Supplementary Data 1 [file 41467_2022_29000_MOESM4_ESM.xlsx]

## Sheet: Supplementary Table 1
Human DEGs	Mouse DEGs	overlapped genes
A2ML1	1500009L16Rik	ABCA6
A4GNT	1700003E16Rik	ACP5
AARSD1	1700003F12Rik	ACTA1
ABCA12	1810010H24Rik	ALPK3
ABCA6	4833439L19Rik	ANXA2
ABCB1	4930524J08Rik	ANXA8
ABCC9	4932438H23Rik	APCDD1
ABCG2	4933402E13Rik	AQP3
ABHD12B	6330409D20Rik	AREG
ABHD14B	6430571L13Rik	ARHGEF37
ABHD15	9230104L09Rik	ASAP3
ABI3BP	Aard	ASB9
ABO	Abca6	ASIC2
ABRACL	Abca8a	ASS1
ACADS	Abcb9	B3GAT2
ACE	Abcc12	B3GNT7
ACER2	Acd	BEAN1
ACOD1	Acot1	BFSP1
ACP5	Acsbg2	BMP4
ACSL6	Acsl1	BPIFB1
ACSS3	Acss2	BRINP1
ACTA1	Acy3	C1QL4
ACTR1A	Adam22	CADM4
ACVR2B	Adam23	CAPN5
ADA2	Adgrb2	CAV3
ADAL	Adm2	CCDC170
ADAM11	Adora1	CCDC3
ADAMTS14	Adra1a	CCDC60
ADAMTS19	Adra1b	CCDC88B
ADCK4	Adra2c	CCL20
ADD1	Agr3	CD44
ADGRD2	AI593442	CD55
ADGRL1	Ak7	CD5L
ADGRL3	Ak9	CDH6
ADGRV1	Akap12	CDKN1C
ADH4	Akap5	CH25H
ADM5	Als2	CHODL
ADPRH	Ankmy1	CHST9
ADPRHL1	Ankrd46	COL2A1
ADRA2A	Anxa6	CP
ADRB1	Apcdd1	CRABP2
AEBP1	Aph1b	CSF2
AFAP1L2	Appl2	CSPG5
AFF2	Aqp6	CTTNBP2
AFP	Ar	CXCL1
AGAP12P	Arhgap10	CXCL2
AGMO	Arhgap22	CXCL3
AGR2	Arhgap31	DAPK1
AHRR	Arhgap33	DES
AIF1L	Arhgef10	DHRS3
AIM2	Arhgef11	DLGAP1
AJAP1	Arhgef37	DMTN
AK3	Armc2	DNASE1L2
AKR1B10	Arxes1	DUSP4
AKR1C2	Arxes2	EBI3
AKR1C4	As3mt	EGLN3
ALDH1A1	Asap1	EGR3
ALDH1L1	Asap3	ELK3
ALDH2	Asb9	EREG
ALPK3	Ascl4	ESPN
ALX1	Asic1	ETNK2
AMBP	Asic2	ETV1
ANGPT1	Astn2	FAM189A1
ANGPTL3	Atp7b	FAT2
ANK3	Avpr2	FBXO40
ANKH	Axin2	FER1L6
ANKLE1	Azin2	FFAR4
ANKRD20A1	B3gat2	FGFR4
ANKRD34B	B4galt4	FOXG1
ANKRD45	Bace2	FOXP2
ANKRD60	Bach2	FPR1
ANKRD7	BC035044	FXYD3
ANO2	BC049715	GCNT2
ANO4	Bcan	GJA1
ANO5	Bckdha	GPR88
ANO9	Bcl2	GPSM1
ANTXR2	Bmyc	GRIN2B
ANXA10	Bsn	HAPLN2
ANXA2	Btnl9	HAS1
ANXA8	C1ql4	HMCN1
AOC1	C1qtnf12	HPGD
AP1M2	C2cd4d	IFI44
AP3S2	C4bp	IGSF1
APAF1	Cabcoco1	INHBA
APCDD1	Cachd1	KCND2
APCDD1L	Cacna1d	KCNH3
APOA5	Cacng7	KCNJ2
APOL6	Car8	KCNQ1
AQP3	Caskin1	KCNT2
ARC	Cbfa2t3	KIF27
AREG	Cbs	KLRG1
ARHGAP25	Ccdc106	KRT20
ARHGAP28	Ccdc134	LCN2
ARHGAP44	Ccdc146	LGR4
ARHGAP9	Ccdc160	LMAN1L
ARHGEF37	Ccdc170	LRRC19
ARID3A	Ccdc60	LRRC63
ARL10	Ccdc65	LRRK2
ARL13B	Ccdc74a	LRRN2
ARL2-SNX15	Cck	LTBP4
ARMCX5-GPRASP2	Ccr9	MARK1
ARNT2	Cd163	MATN1
ARRDC4	Cd163l1	MGARP
ASAH2	Cd207	MGST2
ASAP3	Cd209f	MMP7
ASB12	Cd300lg	MSH4
ASB9	Cdc42ep2	MSLN
ASCL2	Cdh16	MUC5AC
ASIC2	Cdh22	MUC5B
ASIC5	Cdh4	MYB
ASMTL	Cdh6	MYOM1
ASPN	Cdhr4	NCMAP
ASS1	Cdk20	NID2
ASTN1	Cdkl1	NKD1
ASXL3	Cdon	NMNAT2
ATG7	Ceacam3	NPNT
ATP13A2	Cercam	NRK
ATP2B2	Ces1d	NUPR1
ATP2B4	Ces1e	OGDHL
ATP2C2	Ces1g	OMP
ATP5ME	Cfap61	OTUB2
ATP6AP1	Chgb	OXTR
ATP6V1G2	Chil5	P2RX3
ATP6V1G2-DDX39B	Chrm2	PAPLN
AURKC	Chst10	PAPSS2
AZU1	Chst3	PCSK9
B3GAT2	Chst8	PDGFRL
B3GNT7	Chst9	PDZK1IP1
BAALC	Cish	PIGR
BANK1	Cited4	PIK3AP1
BARHL2	Clcnkb	PKDCC
BBOX1	Cldn10	PKP1
BCAM	Cnmd	PLAT
BCHE	Cnot1	PLCL1
BCL11A	Cnr1	PNP
BCL2L14	Cntd1	PNPLA1
BDH2	Cntfr	PODXL
BDNF	Cobll1	PPP1R1A
BEAN1	Col28a1	PRR16
BEX1	Col9a3	PRRT1
BFSP1	Copg2	PRSS2
BGLAP	Cpa5	PRSS22
BICDL2	Cplx2	RAB3C
BIN1	Cpne1	RAB44
BLOC1S5	Cpne5	RAPGEF3
BMF	Cryba2	RHPN1
BMP10	Cryz	RORB
BMP4	Cspg5	ROS1
BNIPL	Ctnnd2	RTP4
BOLA2	Ctsf	S100A14
BOLA2B	Cttnbp2	SCIMP
BPIFB1	Cyp2j9	SDK1
BRD3	D430019H16Rik	SEMA3C
BRINP1	D630036H23Rik	SERINC5
C10orf90	D630045J12Rik	SESN2
C11orf52	Dag1	SHC4
C11orf91	Dapk1	SKAP1
C11orf94	Dbil5	SLC12A2
C12orf54	Dcaf11	SLC15A1
C14orf169	Dcx	SLC26A7
C15orf38-AP3S2	Dgkb	SLC44A3
C15orf48	Dhcr24	SLC4A4
C15orf59	Dhrs3	SLC7A11
C16orf74	Diaph3	SLC9B1
C16orf89	Disp2	SLIT2
C17orf82	Dlgap1	SMOC1
C18orf65	Dlgap3	SOAT2
C19orf57	Dmrta1	SPP1
C19orf60	Dmtn	SPTBN4
C1orf116	Dnah11	SRGAP3
C1orf189	Dnaic2	STEAP1
C1QL4	Dnajc22	SYNPO2
C1QTNF1	Dnase1	SYTL2
C1QTNF9	Dnase1l2	TCAP
C1QTNF9B	Dnmt3c	TFEC
C1QTNF9B-AS1	Dntt	TGM2
C1R	Dock10	THRB
C2	Dok5	TIGIT
C20orf173	Dok6	TMEM47
C20orf27	Dpep1	TNC
C2CD6	Dscaml1	TNFAIP6
C2orf69	Dusp16	TNFSF9
C2orf72	Dynll2	TNIP3
C3	E230025N22Rik	TOX2
C3orf18	E2f2	TRIM29
C3orf49	Ebf4	TTLL9
C3orf58	Eddm3b	UBE2L6
C3orf80	Efr3b	WISP1
C4A	Egfl6	XIRP2
C4B	Egflam	ZFPM1
C4B_2	Egln3	ZMAT4
C5orf46	Eid3
C6orf15	Eif2ak4
C7orf57	Elfn2
C7orf60	Elovl2
C7orf71	Enpep
C8A	Esp6
C8orf46	Esp8
C9orf116	Espn
CA7	Etnk2
CACNA1C	Exd1
CACNB3	Exoc3l2
CACNG4	Ezr
CADM1	Fabp3
CADM4	Fam13a
CALB2	Fam171a1
CALHM6	Fam171a2
CAMK2B	Fam184b
CAPG	Fam189a1
CAPN2	Fam189a2
CAPN5	Fam19a5
CARD14	Fam20c
CAV3	Farp2
CCDC109B	Fat2
CCDC110	Fbxo39
CCDC13	Fbxo43
CCDC152	Fbxo7
CCDC166	Fbxw10
CCDC170	Fcmr
CCDC183-AS1	Fgf1
CCDC188	Fig4
CCDC3	Fn3k
CCDC40	Fndc7
CCDC60	Folr1
CCDC64B	Foxe1
CCDC73	Foxf1
CCDC80	Foxo6
CCDC88B	Frmpd1
CCDC92	Fyb2
CCL2	Gabrg3
CCL20	Gabrr1
CCL24	Galns
CCNG2	Gata6
CCNJL	Gck
CCNYL1	Gfra3
CCR1	Gga2
CCR10	Gipc2
CCT3	Gja4
CD200	Gjb1
CD22	Gjd3
CD226	Gli1
CD24	Gli2
CD37	Glis1
CD40	Gm10134
CD44	Gm11627
CD55	Gm15319
CD5L	Gm16253
CD69	Gm3752
CD70	Gm38431
CD8A	Gm44501
CDC25B	Gm5127
CDC6	Gm6665
CDH20	Gm9887
CDH3	Gnat2
CDH6	Gng13
CDK5R2	Gng4
CDK5RAP1	Gpc3
CDK6	Gpr1
CDKN1A	Gpr137b
CDKN1C	Gpr150
CDKN3	Gpr153
CDRT15	Gprin1
CDS2	Gpsm1
CEACAM1	Gramd2
CEACAM19	Grhl1
CEACAM5	Gria1
CELF2	Grik4
CELF3	Grin2b
CELF5	Grm4
CFAP221	Grp
CFAP65	Gsn
CFH	Gsta3
CFHR1	Gstm2
CFP	Gstm7
CGB1	Gtf3c1
CGB5	H1fx
CGB8	H2-M9
CGNL1	H2-Oa
CH25H	Hapln2
CHAC1	Hcar1
CHFR	Hcn2
CHI3L1	Hdac11
CHI3L2	Hdgfl3
CHKB-CPT1B	Hecw2
CHMP7	Hist2h4
CHODL	Hmcn1
CHRM3	Hmgxb3
CHRNA1	Hpgd
CHRNA3	Hs3st1
CHRNG	Hs3st3a1
CHST1	Hs3st6
CHST6	Hspg2
CHST9	Htr6
CIDEA	Htra4
CIDEB	Hydin
CKLF	Id2
CKLF-CMTM1	Id3
CKS2	Id4
CLDN2	Ifi214
CLDN20	Igfals
CLDN22	Igfbp2
CLEC18C	Igsf1
CLEC3B	Il17d
CLEC4M	Il17rb
CLIC4	Il17re
CLIP2	Il24
CMA1	Irs3
CMTR1	Isl1
CNGA1	Ism1
CNGB3	Iyd
CNIH2	Kcnb1
CNN1	Kcnb2
CNR2	Kcnd2
CNTD2	Kcnd3
COL11A1	Kcnh3
COL13A1	Kcnh4
COL14A1	Kcnip3
COL15A1	Kcnk16
COL19A1	Kcnk3
COL2A1	Kcnk5
COL6A3	Kcnt1
COL6A6	Kcnt2
COL7A1	Kdr
COL8A1	Khdc1a
COMMD7	Klf1
CORO1A	Klf15
CORO7-PAM16	Klhl14
COX6B2	Klhl23
CP	Klhl29
CPA6	Klrg1
CPE	Krt25
CPEB4	Krtap5-5
CR2	Kyat3
CRABP2	Lactbl1
CRACR2A	Lamb2
CRAT37	Lcn3
CRB1	Lcn5
CRB2	Lcn8
CRB3	Lgr4
CREB3L2	Lifr
CREG2	Limch1
CRIP1	Lime1
CRYBB3	Lims2
CRYBG2	Lin7a
CSF1	Lingo1
CSF2	Lingo3
CSF2RA	Lonrf3
CSGALNACT1	Lpin1
CSMD3	Lrfn1
CSPG5	Lrguk
CST6	Lrp3
CTAGE8	Lrpap1
CTAGE9	Lrrc19
CTDSP1	Lrrc31
CTGF	Lrrc6
CTNNBIP1	Lrrc75b
CTRB1	Lrrn2
CTSH	Ltb4r2
CTTNBP2	Ltbp4
CX3CL1	Ly75
CXADR	Lypd6
CXCL1	Lypd6b
CXCL2	Mamld1
CXCL3	Man2a1
CXCL5	Maneal
CXCL6	Map3k15
CXCL8	Map3k21
CXCR5	Mapk10
CXXC5	Mapk4
CYB5R2	Mapk8ip1
CYBRD1	Mark1
CYP19A1	Masp1
CYP1B1	Mboat2
CYP26B1	Mcf2l
CYP2B6	Mchr1
CYP2E1	Med16
CYP3A7-CYP3A51P	Meioc
CYR61	Meis2
DAB1	Mfsd4b5
DAPK1	Mgat5
DAPP1	Mgat5b
DAZL	Mgl2
DCHS2	Mgll
DCLK2	Mical3
DCN	Mmp24
DCP2	Mob3a
DDIT4	Morn4
DDX43	Mpp2
DDX55	Msh4
DDX60L	Msrb1
DEF6	Mtmr4
DEFB109B	Mum1l1
DEFB115	Myb
DEFB126	Nanog
DEFB129	Nckap5
DEFB131B	Nefl
DEFB132	Neurl2
DENND1B	Nid2
DENND1C	Nkain4
DES	Nkd1
DGAT2	Nme4
DHCR7	Nmu
DHRS11	Nos1ap
DHRS3	Npffr2
DIXDC1	Nphp4
DKK2	Npnt
DLGAP1	Nppc
DLL1	Npr3
DLL4	Npy1r
DLX4	Npy2r
DMBT1	Nr1h4
DMKN	Nrn1
DMTN	Nsg2
DNAAF1	Nt5dc2
DNAH7	Nxph3
DNAJA4	Obp2a
DNAJC5	Obp2b
DNALI1	Ociad2
DNASE1L2	Odf3
DOCK2	Ogdhl
DOK7	Otoa
DPYS	Otol1
DQX1	Otub2
DRD3	Oxtr
DSC2	P2ry1
DSEL	P3h2
DTD1	Papln
DUOX2	Papss2
DUSP3	Paqr6
DUSP4	Pax8
DUXAP10	Pcdh20
DYNLRB1	Pcdhb15
DYNLRB2	Pcdhb6
DZIP3	Pcdhga2
EBI3	Pclo
EDAR	Pcnx2
EDIL3	Pcsk1
EDRF1	Pcsk1n
EEF1A2	Pcx
EEF1E1-BLOC1S5	Pde1b
EFCAB12	Pde9a
EFCAB6	Pdpn
EFCAB9	Penk
EFEMP1	Pfn2
EFHB	Piezo1
EFNB3	Pik3ap1
EGF	Pkdcc
EGFL7	Pla2g2d
EGLN3	Pla2g5
EGR3	Plcb4
EIF2B2	Plcd4
EIF6	Plcl1
ELFN1	Plekhh1
ELK3	Plpp1
ELMOD1	Plppr1
ELOVL7	Pls1
EMC3	Plscr2
EMID1	Plscr5
EML5	Pmel
ENPP2	Pnck
EPAS1	Podxl
EPCAM	Pon1
EPHA4	Popdc3
EPHA6	Ppargc1a
EPHB2	Ppib
EPHB3	Ppm1e
EPN3	Ppm1l
EPPK1	Ppp1r1a
EPS8	Prkar2b
ERCC5	Prkcz
ERCC6	Prkd1
EREG	Prob1
ERGIC2	Prom2
ERICH6	Prr5l
ERO1A	Prrt1
ESPN	Ptgds
ESPNL	Pxmp4
ESRRB	Qrich2
ESYT3	Rab11fip4
ETNK1	Rab26
ETNK2	Rab3c
ETS1	Rab3gap2
ETV1	Rad18
EVX1	Ramp3
EXO5	Rapgef3
EXOC3L4	Rassf10
EXTL2	Raver2
F13A1	Rbm20
F5	Rdm1
FAAH2	Rec8
FAHD2A	Rell1
FAM102A	Rell2
FAM102B	Rgs12
FAM105A	Rhcg
FAM106B	Rhobtb1
FAM122C	Rhpn1
FAM126A	Ric3
FAM131C	Rimklb
FAM133A	Rims4
FAM138E	Ripor3
FAM13C	Ripply3
FAM151A	Rln3
FAM155B	Rnase1
FAM156B	Rnf144a
FAM166B	Rnf223
FAM167B	Rnf225
FAM174A	Ros1
FAM184A	Rtn1
FAM189A1	Sash1
FAM198B	Scd3
FAM212A	Scg3
FAM25A	Scgb1c1
FAM25G	Scn5a
FAM43B	Scn7a
FAM46A	Scrt1
FAM57B	Scube2
FAM72C	Scube3
FAM72D	Sec14l4
FAM74A7	Sema3b
FAM81B	Serinc5
FAM83E	Sesn2
FAM84A	Sh3bp5
FAM84B	Sh3rf3
FAM86B1	Shank1
FANCD2OS	Shisa2
FASLG	Shisa8
FAT2	Shox2
FBLN2	Sipa1l3
FBLN5	Slc13a5
FBXO40	Slc16a2
FCHO1	Slc22a3
FCRLA	Slc24a2
FDCSP	Slc24a3
FER1L5	Slc26a10
FER1L6	Slc26a3
FFAR4	Slc26a7
FGD3	Slc27a6
FGF22	Slc2a12
FGF7	Slc38a11
FGFBP1	Slc38a5
FGFR1	Slc43a2
FGFR3	Slc44a3
FGFR4	Slc46a1
FIBIN	Slc4a1
FIGNL2	Slc4a10
FILIP1	Slc4a4
FKBP11	Slc4a5
FLG	Slc6a17
FLG2	Slc6a18
FLJ20712	Slc6a19
FMN2	Slc6a9
FMNL3	Slc8a1
FOS	Slc9a3r2
FOXD4L3	Slit1
FOXD4L6	Smad9
FOXE3	Smarca1
FOXG1	Smim3
FOXP2	Smoc2
FOXRED2	Sned1
FPR1	Snx22
FSBP	Sorbs1
FSTL5	Sort1
FUT2	Sowaha
FXYD3	Sox15
FXYD6	Sp9
FYB1	Spdef
FZD1	Spsb3
FZD4	Sptbn4
FZD6	Sptssb
GAB2	Srgap3
GABRA3	Srrm4
GABRG1	Sstr3
GAGE1	Ssu2
GAGE12E	St6gal1
GAGE12F	St6gal2
GAGE12G	Stac
GAGE12H	Stmn3
GAGE2A	Stxbp5
GALNT10	Susd1
GALNT11	Syna
GALNT15	Synpo2
GALNT4	Syt9
GALNT5	Tbx2
GALNT9	Tbx22
GALNTL6	Tbxa2r
GAP43	Tceal3
GATA3	Tdh
GATM	Tenm3
GBP2	Tesmin
GBP4	Tfcp2l1
GBX1	Tg
GCDH	Them4
GCG	Themis3
GCNT2	Thrb
GDAP1L1	Thrsp
GDF5	Tigd5
GDF6	Tldc2
GDPD3	Tlr11
GIF	Tmem121
GIP	Tmem121b
GJA1	Tmem130
GJA9-MYCBP	Tmem150c
GJB2	Tmem200b
GJB7	Tmem211
GJC2	Tmem25
GJE1	Tmem266
GLIPR1L2	Tmem8b
GLRA2	Tmigd1
GLRX2	Tmprss5
GMNC	Tmprss6
GNAL	Tmprss9
GNAO1	Tnc
GNG8	Tnfrsf18
GOLGA6L1	Tox2
GOLGA6L3	Tpo
GOLGA8B	Trank1
GOLGA8H	Trhde
GOLGA8K	Trim2
GOLGA8O	Trim66
GOLGA8R	Trmt9b
GP1BB	Trpc5
GPAT2	Tsga13
GPC4	Tspan15
GPIHBP1	Tspan5
GPM6A	Ttc28
GPR141	Ttc39c
GPR143	Ttc7b
GPR160	Ttc8
GPR182	Tuba8
GPR3	Tunar
GPR35	Tymp
GPR39	Ubash3a
GPR4	Ubl4b
GPR45	Unc13c
GPR65	Upb1
GPR75-ASB3	Upk3a
GPR84	Upk3b
GPR88	Usp53
GPSM1	Vash2
GPX2	Vasn
GRAMD1C	Vit
GRAP2	Vsig10l
GRASP	Vstm2b
GRID2IP	Vstm2l
GRIK2	Vwa5b1
GRIN2B	Vwde
GRK5	Wdr86
GSDMC	Wfikkn2
GSTT2	Wisp1
GTF2F2	Wisp3
GTF2H2	Wnk2
GTF2IP1	Xlr3a
GTPBP6	Xlr5a
GUCY2D	Xylb
GYPC	Zbtb12
GYS2	Zbtb16
H19	Zbtb46
HADHA	Zbtb8a
HAPLN2	Zbtb8b
HAS1	Zcchc12
HCFC1R1	Zdbf2
HECW1	Zfand4
HEG1	Zfp354b
HEPHL1	Zfp385b
HES4	Zfp536
HEXDC	Zfp773
HEY2	Zfp853
HIGD1C	Zfp941
HINT3	Zfpm1
HIRIP3	Zfyve21
HIST1H1C	Zswim1
HIST1H2AH	1110002E22Rik
HIST1H2AI	2010005H15Rik
HIST1H2AL	2200002D01Rik
HIST1H2BK	2300002M23Rik
HIST1H2BM	2310007B03Rik
HIST1H3I	4930452B06Rik
HIST1H4D	4930550C14Rik
HIST1H4H	4933430I17Rik
HIST1H4J	5930422O12Rik
HIST1H4K	9130230L23Rik
HIST2H2AA3	9330159F19Rik
HIST2H3PS2	AA467197
HIST2H4A	Aass
HLA-B	Abcg1
HLA-DRB5	Ablim3
HMCN1	AC122413.2
HMGCR	Acan
HMGCS1	Acox2
HNRNPLL	Acp5
HORMAD2	Acsbg1
HOTAIRM1	Acsl4
HOTS	Acta1
HOXA1	Actn2
HOXA10	Adam28
HOXA10-AS	Adam8
HOXA13	Adcy10
HOXB2	Adcy2
HOXB-AS1	Adgre5
HOXC11	Adgrg3
HOXD8	Agbl1
HOXD9	Agt
HPGD	Ahnak2
HPX	Akr1b8
HR	Aldh1a3
HRASLS	Aldh3b1
HRASLS2	Aldh3b2
HRK	Alpk2
HS1BP3	Alpk3
HS6ST3	Amn
HSD17B13	Amot
HSD17B3	Amotl1
HSD17B8	Ang
HSDL1	Angptl1
HSF4	Ank1
HSPB6	Ankrd1
HSPB9	Ankrd2
HSPE1-MOB4	Ankrd35
HTD2	Ankrd55
HTN1	Anxa1
HTR2B	Anxa2
ICAM3	Anxa3
ID	Anxa8
IDH2	Ap1s2
IFI35	Apol10b
IFI44	Apol9a
IFITM1	Apol9b
IFITM10	Aqp2
IFITM2	Aqp3
IGF2	Aqp5
IGF2BP3	Areg
IGFBP4	Arhgap40
IGFBP5	Arl4c
IGFL2	Arl9
IGHV1-3	Arntl2
IGLON5	Arsj
IGSF1	Art1
IGSF9	Asprv1
IK	Ass1
IKZF2	Atp11c
IL10	Atp13a4
IL12RB1	Atp1a2
IL17RC	Atp1a4
IL19	Atp1b4
IL1RL1	Atp2a3
IL27RA	Atp6v0d2
IL36G	Atp6v1c2
IL36RN	Atp8a2
IL4	Atrnl1
IL7R	B3galnt1
ILKAP	B3gnt3
IMPA2	B3gnt6
INHBA	B3gnt7
INSL6	B430306N03Rik
IQCJ-SCHIP1	B4galnt3
IQCN	B4galt6
IRAK4	Batf3
IRF8	Baz1a
IRGM	Bcar3
ITGA11	Bcl2a1a
ITGB5	Bcl2a1b
ITGB6	Bcl2a1d
ITGB8	Bcl2l11
ITK	Bcl3
ITM2A	Bcr
ITPKB	Bean1
JAK3	Bfsp1
JDP2	Bhlha9
JPH3	Bhlhe40
JUN	Bmp4
JUND	Bpifb1
KCND2	Brinp1
KCNG3	Bst1
KCNH3	Btbd17
KCNH5	Btbd18
KCNJ12	Cacna2d4
KCNJ16	Cacng3
KCNJ2	Cadm4
KCNJ4	Cald1
KCNJ5	Capn5
KCNJ6	Car5b
KCNK2	Car6
KCNK7	Casp3
KCNMB2	Casp4
KCNN3	Casq1
KCNQ1	Casq2
KCNQ3	Cav2
KCNT2	Cav3
KCTD10	Cbr3
KCTD4	Ccdc171
KCTD6	Ccdc3
KCTD7	Ccdc88b
KIAA0319	Ccl20
KIAA1324L	Ccl21a
KIF16B	Ccl8
KIF26A	Cd109
KIF27	Cd177
KIRREL	Cd300lf
KLF12	Cd302
KLHDC8B	Cd38
KLHL35	Cd44
KLK10	Cd55
KLRG1	Cd5l
KMO	Cda
KNDC1	Cdh2
KPNA7	Cdh24
KRT13	Cdkn1c
KRT20	Cfap299
KRT23	Cfap43
KRT71	Cfap99
KRT86	Cgref1
KRTAP2-3	Ch25h
KRTAP3-1	Chia1
LACC1	Chil1
LAMA1	Chit1
LAMA2	Chodl
LAMA5	Chrm1
LAMC2	Chrnb1
LANCL3	Chrnd
LAPTM5	Chst13
LAT2	Cilp2
LBX2-AS1	Clca3a1
LCMT1	Clca3a2
LCN1	Cldn11
LCN2	Cldn19
LCT	Clec4d
LDAH	Clec4n
LENEP	Cmbl
LFNG	Cmya5
LGALS4	Cntn3
LGR4	Cntnap2
LGSN	Col22a1
LHFPL2	Col2a1
LHFPL4	Comp
LHPP	Coro2a
LHX1	Coro6
LHX6	Cox6a2
LHX9	Cp
LIN7C	Cpne4
LINC00211	Crabp2
LINC00958	Crct1
LINC01124	Creb3l1
LINC01224	Crlf1
LINC01389	Crym
LINC01426	Csf2
LINC01558	Csf2rb2
LINC01585	Csf3
LINGO2	Csf3r
LIPA	Csn3
LIPC	Csrp3
LIPG	Cst8
LMAN1	Ctsc
LMAN1L	Ctsw
LMLN2	Cubn
LMOD2	Cwh43
LOC100101148	Cxcl1
LOC100128233	Cxcl2
LOC100130705	Cxcl3
LOC100132287	Cxcr2
LOC100133331	Cxcr4
LOC100287036	Cyp26a1
LOC100288152	Cyp2d26
LOC100289673	Cyp2f2
LOC100506178	Cysrt1
LOC100630923	Cytl1
LOC100996598	D6Ertd527e
LOC101059906	Dapk2
LOC101060022	Daw1
LOC101927262	Dbh
LOC101927322	Depp1
LOC101927954	Des
LOC101928093	Dhrs7c
LOC101929322	Dhx40
LOC101929372	Dlk1
LOC101929524	Dmp1
LOC101929578	Dsc3
LOC101929959	Dse
LOC101930420	Dusp10
LOC102723534	Dusp27
LOC102723899	Dusp4
LOC102724646	Dynlt1a
LOC102724877	Dysf
LOC105369199	Ebi3
LOC105369669	Ecm1
LOC105369728	Eda2r
LOC105369869	Egr3
LOC105370579	Ehd3
LOC105371371	Elk3
LOC105371448	Elobl
LOC105373102	Elovl5
LOC105373289	Emp1
LOC105375131	Emp3
LOC105378189	Eno3
LOC105378260	Enpp6
LOC105378947	Epha3
LOC107983947	Ephb6
LOC107983990	Ereg
LOC107984043	Erich2
LOC107984817	Erich3
LOC107984832	Etv1
LOC107984841	F11
LOC107984859	F2rl2
LOC107984876	Fads3
LOC107985082	Fam19a3
LOC107985103	Fam209
LOC107985149	Fam217a
LOC107985320	Fam25c
LOC107985381	Fam69b
LOC107985410	Fam71f2
LOC107985678	Fam78b
LOC107986113	Fbxo40
LOC107986876	Fcamr
LOC107987269	Fcer1g
LOC112268052	Fer1l6
LOC112268068	Fetub
LOC112268119	Ffar4
LOC112268145	Fgfr4
LOC112268186	Fhl2
LOC112268238	Fitm1
LOC112268260	Flnc
LOC112268284	Fosl1
LOC112268444	Foxg1
LOC112268453	Foxp2
LOC112268473	Fpr1
LOC283683	Fpr2
LOC388436	Fsd2
LOC388692	Fxyd3
LOC389602	Fxyd5
LOC400927-CSNK1E	Gabbr2
LOC403323	Gabra2
LOC441155	Gabrr2
LOC541473	Galr2
LOC79999	Gapt
LONRF2	Gcnt2
LOXL4	Gcnt3
LPAR1	Gcnt4
LPAR2	Gda
LPAR4	Gdnf
LPAR5	Gdpd2
LRIG1	Gja1
LRIG3	Gja3
LRIT3	Gja5
LRP12	Gldc
LRRC19	Glipr2
LRRC2	Gm10184
LRRC47	Gm10382
LRRC63	Gm12355
LRRC70	Gm14137
LRRC8E	Gm15217
LRRC9	Gm17571
LRRK2	Gm29797
LRRN1	Gm3839
LRRN2	Gm42791
LRRN3	Gm45799
LRTM1	Gm4707
LSMEM2	Gm4951
LTBP1	Gm5431
LTBP4	Gm8251
LTC4S	Gm9780
LTK	Gng11
LUM	Golga7b
LY6G5C	Gp2
LY96	Gpc6
MAB21L2	Gper1
MAF	Gpr142
MAGEA6	Gpr171
MAGEB6	Gpr55
MAGEC1	Gpr62
MAGED4B	Gpr82
MAJIN	Gpr88
MAML2	Grem1
MANSC4	Grem2
MAOB	Grin3b
MAP1LC3B	Gsap
MAP2	Gsdmd
MAP3K19	Gsto1
MAPRE2	Gzmd
MARCKSL1	Gzme
MARK1	H2-M5
MAST3	H2-Q10
MATN1	Has1
MBLAC2	Hc
MCCD1	Hcar2
MDGA1	Hdac9
MDH1B	Hfe2
MDK	Hhatl
MEF2BNB-MEF2B	Hist1h2bb
MEF2C	Hist1h2bf
MEFV	Hist1h2bj
MEGF6	Hkdc1
MERTK	Hmgn3
METTL12	Hmox1
METTL23	Hpcal4
METTL25	Hrc
MFAP2	Hsbp1l1
MGAM	Hspa2
MGARP	Hspb1
MGST1	Ifi202b
MGST2	Ifi204
MILR1	Ifi211
MIR1181	Ifi213
MKNK2	Ifi27l2a
MLXIP	Ifi27l2b
MLYCD	Ifi44
MMGT1	Ifit1
MMP1	Ifitm3
MMP7	Igf2bp1
MN1	Igfbp3
MOB3B	Il13ra2
MOB4	Il18rap
MOV10L1	Il1r2
MPP7	Il1rl2
MPZ	Il1rn
MR1	Il4ra
MRGPRF	Inava
MRM1	Inhba
MROH2A	Inhbb
MSH4	Ip6k3
MSLN	Iqub
MSX1	Irf7
MT1F	Isg15
MTHFD2P1	Isg20
MTNR1B	Itga2
MUC13	Itga8
MUC2	Itgav
MUC5AC	Itgb1bp2
MUC5B	Ivl
MUSK	Kbtbd12
MYB	Kcnc4
MYBL1	Kcnip1
MYCL	Kcnj2
MYCN	Kcnma1
MYH10	Kcnmb1
MYL9	Kcnq1
MYLK4	Kcnq5
MYOM1	Kif27
MYPN	Klb
MYRIP	Klf5
NAA11	Klhl40
NACC2	Klkb1
NANOS1	Krt12
NAPSA	Krt14
NAT2	Krt15
NATD1	Krt19
NBPF20	Krt20
NBPF8	Krt24
NCMAP	Krt5
NCR1	Krt7
NDN	Krt78
NDNF	Krt79
NDUFAF4	Krt87
NEBL	Krtap17-1
NECAB2	Krtdap
NEO1	Lcn2
NEURL1B	Ldb3
NEURL3	Lgals3
NFASC	Lgals9
NHLRC1	Lgr6
NID2	Lhfpl3
NIM1K	Lif
NINJ2	Lilr4b
NIPAL3	Lipf
NIPAL4	Liph
NIPSNAP3B	Litaf
NKAIN1	Lman1l
NKD1	Lrp2bp
NME1-NME2	Lrrc26
NME3	Lrrc30
NMNAT2	Lrrc4
NNMT	Lrrc63
NOD2	Lrrd1
NOV	Lrrk2
NOX4	Lurap1l
NOX5	Ly6c2
NOXO1	Ly6d
NPIPA2	Ly6g6c
NPIPA8	Lynx1
NPIPB6	Lypd3
NPIPB9	Marcks
NPNT	Matn1
NPW	Mbl1
NR2E1	Mboat1
NR4A3	Mcemp1
NR5A2	Mcpt8
NRARP	Mctp1
NRBP2	Mdfi
NREP	Meltf
NRG1	Mesp2
NRK	Met
NT5C1B	Metrnl
NTRK2	Mfap3l
NUCB1	Mgarp
NUDT4P2	Mgat3
NUP93	Mgst2
NUPR1	Mlip
NUTM2B	Mmp14
NYNRIN	Mmp7
OCA2	Mmp8
ODF3L2	Mmp9
OGDHL	Morc1
OGFRP1	Morc4
OLFM2	Mpp1
OLFML3	Msc
OMD	Msln
OMP	Msn
OPLAH	Mss51
OPN5	mt-Atp8
OPRK1	Mterf1b
OR10A4	Muc16
OR13D1	Muc5ac
OR1J1	Muc5b
OR1J2	Mucl2
OR4F13P	Mxra8
OR4F15	Mybpc1
OR4F4	Myh2
OSGIN1	Myh3
OSR1	Myh8
OSR2	Myl1
OTOF	Myl2
OTOGL	Myl4
OTUB2	Mylpf
OTUD5	Myo18b
OVOL1	Myod1
OXTR	Myog
P2RX3	Myom1
P2RX5	Myoz1
P2RY8	Myoz2
PAGE1	Myt1l
PALLD	Ncam1
PAM16	Ncmap
PANDAR	Ndrg2
PAPLN	Ndrg4
PAPSS2	Neurl1a
PAQR9	Nlrp12
PARD6B	Nmnat2
PARM1	Nova1
PATE3	Npc2
PBX3	Nqo2
PBXIP1	Nrk
PCBP3	Nrp1
PCDH11X	Nts
PCDHA10	Nup62cl
PCDHA13	Nupr1
PCDHB12	Oas1a
PCDHB9	Odaph
PCDHGA3	Oit1
PCDHGA9	Olfm4
PCIF1	Olfr1420
PCOTH	Olfr920
PCP4	Omp
PCSK5	Onecut2
PCSK9	Orm1
PCYOX1L	Osm
PDE3B	Osmr
PDE6A	Otos
PDE6C	Ovgp1
PDGFA	P2rx3
PDGFRB	Palmd
PDGFRL	Paqr8
PDIA2	Pax1
PDK4	Pbp2
PDSS2	Pbx4
PDZK1IP1	Pcdh15
PEAK1	Pcdh8
PFKFB4	Pcsk9
PGBD3	Pde4c
PGBD5	Pdgfc
PGM5	Pdgfrl
PHEX	Pdzk1ip1
PHF20	Perm1
PHF21B	Pgam2
PHGR1	Pglyrp1
PHYHD1	Phc2
PIAS4	Pigr
PIF1	Pilra
PIGR	Pim1
PIK3AP1	Pkib
PIK3R1	Pkp1
PIK3R5	Pla2g2e
PIP5K1B	Plat
PITPNM2	Plaur
PITX2	Plcd3
PKDCC	Pllp
PKDREJ	Pmepa1
PKHD1L1	Pnp
PKNOX2	Pnpla1
PKP1	Pon3
PLA2G10	Pou1f1
PLA2G4B	Ppm1j
PLA2G4F	Ppp1r18
PLAGL1	Ppp1r27
PLAT	Ppp1r36
PLB1	Pqlc3
PLBD1	Prkar1b
PLCL1	Prkg2
PLD4	Prnp
PLEKHA4	Prol1
PLEKHB1	Prom1
PLEKHG4	Pros1
PLEKHJ1	Prps1l1
PLGLB1	Prr16
PLK2	Prr29
PLXNA2	Prr7
PLXNA4	Prss2
PMFBP1	Prss22
PNP	Psca
PNPLA1	Pstpip1
POC1B-GALNT4	Ptgfrn
PODXL	Ptgs2
POMK	Pthlh
POU2AF1	Ptn
POU3F1	Ptprz1
POU3F2	Ptx3
PPARG	Pxdc1
PPDPF	Rab27a
PPFIA2	Rab32
PPIF	Rab38
PPL	Rab44
PPP1R14D	Raet1d
PPP1R1A	Ramp1
PPP1R1C	Rangrf
PPT2-EGFL8	Rbfox1
PRAM1	Rbm24
PRB2	Rcan1
PRB4	Rcor2
PRKCG	Reg3g
PRKCQ	Rftn2
PRMT6	Rgs1
PRMT8	Rgs4
PROKR2	Riiad1
PRPF39	Ripk3
PRPH2	Ripply1
PRR16	Rnasel
PRRT1	Rnf183
PRSS1	Rorb
PRSS2	Rps6ka4
PRSS22	Rtp4
PRSS27	Runx1
PRSS35	Runx2
PSD3	S100a14
PSG11	S100a6
PSG6	S100a8
PSG9	S100a9
PSMA6	S100g
PSMB8	Saa3
PSMB8-AS1	Samd13
PSMB9	Sat1
PTAFR	Sbpl
PTGFR	Scgb2b7
PTK2B	Scgb3a1
PTK7	Scimp
PTPN14	Scn1b
PTPN6	Sdc1
PTPRC	Sdk1
PTPRQ	Sema3c
PTPRT	Sept5
PYGM	Serpinb11
RAB10	Serpinb1a
RAB28	Serpinb2
RAB30	Serpinb5
RAB36	Serpinb6a
RAB3C	Serpinb6b
RAB43	Serpinb7
RAB44	Serpinb9b
RAB6B	Sftpa1
RAD51AP2	Sftpd
RAD51L3-RFFL	Sgsm1
RALGPS2	Sh2d1b1
RANBP3L	Sh2d1b2
RAPGEF3	Sh3glb1
RAPSN	Shc4
RARG	Sirpb1b
RARRES2	Sirpb1c
RASD2	Sit1
RASGEF1B	Six1
RASGRF1	Six4
RASGRP3	Skap1
RASL10B	Slc12a2
RBAK-RBAKDN	Slc12a3
RBP2	Slc15a1
RCBTB2	Slc24a1
REEP1	Slc25a30
REG4	Slc25a35
REPS2	Slc26a9
RET	Slc38a2
RFPL3	Slc4a11
RGL3	Slc6a14
RGPD1	Slc6a6
RGS6	Slc7a11
RGS9	Slc8a3
RHEX	Slc9b1
RHOU	Slco4a1
RHOV	Slco5a1
RHPN1	Slfn1
RIBC2	Slfn2
RILP	Slfn8
RIMBP3	Slit2
RIMBP3C	Sln
RIMS1	Slpi
RIMS3	Smoc1
RIN1	Smtnl1
RMI2	Smyd1
RND1	Snx30
RNF113B	Soat2
RNF133	Socs3
RNF170	Sp5
RNF175	Spink2
RNF180	Spp1
RNF208	Sprr1a
RNF212	Srd5a1
RNF224	St3gal4
RNU6-7	Steap1
RNU6-8	Stk17b
ROBO2	Stk32a
RORB	Stk39
ROS1	Stmn4
RP1L1	Styk1
RPGRIP1	Sypl2
RPL17-C18orf32	Syt8
RPL22L1	Sytl2
RPS10-NUDT3	Tac1
RPS6KA2	Tacstd2
RSPH1	Tarm1
RSPH10B2	Tbc1d2
RSPH14	Tbx15
RSPH6A	Tcap
RSPO3	Tceal7
RTL3	Tceal9
RTL8B	Tcim
RTN3	Tead4
RTP4	Tec
RUBCNL	Tes
RUNDC3A	Tesc
RYK	Tex15
RYR2	Tfec
S100A14	Tff2
S100A3	Tgfbr2
S100A5	Tgm2
S100P	Thbs4
SAA1	Tigit
SAA2	Timp1
SACM1L	Tll1
SAMD14	Tlr4
SAMD5	Tmem154
SAMD9	Tmem2
SAP18	Tmem212
SBK1	Tmem252
SBSPON	Tmem262
SCARF2	Tmem38a
SCG5	Tmem40
SCIMP	Tmem43
SCML2	Tmem47
SCN3B	Tmod4
SCO2	Tmprss4
SCRG1	Tnfaip6
SCT	Tnfrsf22
SCTR	Tnfrsf23
SDC3	Tnfrsf26
SDK1	Tnfsf11
SEBOX	Tnfsf14
SECTM1	Tnfsf9
SEL1L3	Tnip3
SELENBP1	Tnn
SEMA3C	Tnni2
SEMA3E	Tnnt1
SEMA3F	Tnnt2
SEMA4A	Togaram2
SEMA4C	Tomm6
SERF1A	Tpm1
SERF1B	Tpm2
SERINC5	Tprg
SERPINA1	Trdn
SERPINC1	Trex2
SESN2	Trim12a
SESN3	Trim29
SEZ6L2	Trim30d
SFRP1	Trim54
SGIP1	Trim67
SGPL1	Trpa1
SGPP2	Trpv6
SH2D1A	Tspan11
SH2D2A	Tspan2
SH2D4B	Tstd3
SH3BGR	Ttc9
SH3GL2	Ttll9
SH3PXD2A	Ttn
SHANK2	Tuft1
SHANK3	Uap1l1
SHC4	Ubc
SIGLEC9	Ube2l6
SIK1B	Ugt1a6a
SIPA1	Unc5c
SKAP1	Uox
SKOR1	Upp1
SLAMF7	Usp13
SLC10A4	Vcpkmt
SLC12A2	Vipr2
SLC14A1	Vmn1r40
SLC14A2	Vmn1r42
SLC15A1	Vmn1r43
SLC16A6	Wasf1
SLC16A9	Wdr72
SLC1A4	Wfdc12
SLC22A23	Wfdc17
SLC25A13	Wfdc18
SLC25A29	Wnt10a
SLC25A34	Xdh
SLC26A7	Xirp1
SLC26A8	Xirp2
SLC2A3	Ybx3
SLC2A4	Ypel4
SLC2A5	Zfp57
SLC30A3	Zfp993
SLC35F4	Zmat4
SLC38A10
SLC39A8
SLC40A1
SLC44A3
SLC44A5
SLC45A3
SLC48A1
SLC4A4
SLC5A10
SLC5A4
SLC6A13
SLC6A4
SLC7A11
SLC7A2
SLC7A9
SLC9A3
SLC9B1
SLC9B2
SLCO4C1
SLFN12L
SLIT2
SLITRK4
SLMO2-ATP5E
SLX1A
SLX1B
SMCO3
SMG1P6
SMIM10L2A
SMIM11A
SMIM11B
SMIM18
SMIM20
SMOC1
SMPX
SNCG
SNHG5
SNORD86
SNPH
SNRPB2
SNX15
SOAT1
SOAT2
SOBP
SOCS2
SOHLH2
SOSTDC1
SOWAHD
SOX10
SOX13
SOX30
SOX7
SP100
SPAAR
SPANXC
SPANXN1
SPANXN4
SPATA5L1
SPDYE17
SPDYE2B
SPEM1
SPIRE2
SPP1
SPRY1
SPTA1
SPTBN4
SPTLC3
SQRDL
SRGAP2C
SRGAP3
SRL
SRPK3
SSH2
SSPO
SSUH2
ST20-MTHFS
ST3GAL1
ST3GAL4-AS1
ST8SIA4
ST8SIA5
STAB1
STAG3L1
STAT5A
STEAP1
STXBP1
STXBP6
SULT1A1
SULT1C2
SVEP1
SYCE2
SYN2
SYNPO2
SYT12
SYT16
SYTL2
TAL2
TAPBP
TAS2R31
TAS2R4
TASP1
TBC1D16
TBC1D22A
TBC1D3F
TBC1D3L
TBC1D9
TBR1
TBX20
TBX3
TCAP
TCEANC
TCHH
TCN2
TCP11L2
TCTE3
TECTA
TEKT2
TENM1
TERB1
TEX19
TEX46
TFAP2E
TFEC
TFR2
TGFB2
TGFBR3
TGM2
THAP1
THBS1
THEGL
THPO
THRB
TIAF1
TICAM2
TIGD4
TIGIT
TJP3
TLR2
TLX2
TM4SF19
TMC1
TMC4
TMED7-TICAM2
TMEM100
TMEM101
TMEM105
TMEM110-MUSTN1
TMEM150A
TMEM163
TMEM178B
TMEM182
TMEM189-UBE2V1
TMEM216
TMEM229B
TMEM231
TMEM233
TMEM253
TMEM256
TMEM26
TMEM272
TMEM45B
TMEM47
TMEM60
TMEM65
TMPRSS15
TMPRSS2
TNC
TNFAIP2
TNFAIP6
TNFRSF1B
TNFSF9
TNIP3
TNK1
TNS1
TOB2P1
TOX2
TPTE
TRBV9
TRDC
TRERF1
TRIM29
TRIM31
TRIM36
TRPC4
TRPC6
TRPC7
TRPM3
TSLP
TSNAX-DISC1
TSPAN1
TSPAN12
TSPAN13
TSPOAP1
TSPYL1
TTC19
TTC29
TTC9B
TTLL9
TUB
TVP23C-CDRT4
TXNIP
TYW1
U2AF1
UBE2D1
UBE2L6
UBE2V1
UCN2
UGT3A2
UNC13A
UNC5B
UPK3BL
UPP2
URGCP-MRPS24
USH2A
USP12
USP2
USP6
UTP14A
UXS1
VAMP8
VANGL1
VANGL2
VAX2
VCAM1
VGLL4
VILL
VMA21
VPS25
VPS26A
VSNL1
VTN
VWA3B
VWA5B2
VWCE
WARS2
WBP1L
WDR82
WDR93
WIPF3
WISP1
WNT10B
WNT5A
WNT5B
WNT7B
WRB-SH3BGR
WWC2
XIRP2
YIPF4
YIPF7
ZBBX
ZBED3
ZBED6
ZBED6CL
ZBTB10
ZBTB32
ZBTB42
ZC2HC1B
ZCCHC23
ZFP14
ZFPM1
ZIC2
ZMAT4
ZMAT5
ZNF10
ZNF140
ZNF141
ZNF160
ZNF254
ZNF354C
ZNF385B
ZNF43
ZNF431
ZNF462
ZNF486
ZNF491
ZNF518A
ZNF521
ZNF525
ZNF529
ZNF567
ZNF569
ZNF570
ZNF580
ZNF607
ZNF611
ZNF618
ZNF682
ZNF705E
ZNF709
ZNF75A
ZNF80
ZNF816
ZNF816-ZNF321P
ZNF843
ZNF845
ZNF878
ZNF91
ZP1
ZSCAN26
