# Supplementary material for: Targeting myeloid derived suppressor cells reverts immune suppression and sensitizes BRAF-mutant papillary thyroid cancer to MAPK inhibitors
Source: Nat Commun. 2022 Mar 24;13:1588. doi: 10.1038/s41467-022-29000-5 (PMC8948260; doi:10.1038/s41467-022-29000-5)
Supplement: Supplementary file 5 — Supplementary Data 2 [file 41467_2022_29000_MOESM5_ESM.xlsx]

## Sheet: Supplementary Table 2
proteinID	entrezID	uniprotID	K-SH	K-control	logFC	Threshold	T-SH	T-control	logFC	Threshold
IL-1α	3552	P01583	491.261	833.747	-0.761917	TRUE	295.679	437.5	-0.563676	TRUE
ENA-78	6374	P42830	568.906	1148.25	-1.0119	TRUE	568.906	1148.25	-1.0119	TRUE
GCSF	1440	P09919	370.234	591.5	-0.674488	TRUE	370.234	591.5	-0.674488	TRUE
GM-CSF	1437	P04141	2640.89	5648.71	-1.09661	TRUE	888.942	1903	-1.09725	TRUE
GRO	2919	P09341	8027.38	10440	-0.379079	TRUE	8027.38	10440	-0.379079	TRUE
GRO-α	2919	P09341	285.088	397.75	-0.479024	TRUE	285.088	397.75	-0.479024	TRUE
I-309	6346	P22362	50.833	149	-1.53302	TRUE	50.833	149	-1.53302	TRUE
IL-1 b	3553	P01584	130.125	310.81	-1.24972	TRUE	120.94	155.5	-0.359989	TRUE
IL-10	3586	P22301	389.928	547.793	-0.489357	TRUE	408.994	529	-0.37039	TRUE
IL-2	3558	P60568	254.447	411.952	-0.692951	TRUE	301.186	403.25	-0.419813	TRUE
IL-3	3562	P08700	181.461	329.512	-0.857118	TRUE	123.27	303	-1.29059	TRUE
IL-4	3565	P05112	155.464	261	-0.743734	TRUE	155.464	261	-0.743734	TRUE
IL-5	3567	P05113	313.47	524.5	-0.740768	TRUE	313.47	524.5	-0.740768	TRUE
IL-8	3576	P10145	4180.17	8942.25	-1.09689	TRUE	4180.17	8942.25	-1.09689	TRUE
MCP-2	6355	P80075	141.508	245.596	-0.791107	TRUE	200.79	262.25	-0.383576	TRUE
MCP-3	6354	P80098	95.7523	305.642	-1.66419	TRUE	90.4404	188.5	-1.05129	TRUE
MCSF	1435	P09603	254.223	189.98	0.418338	TRUE	199.52	422.5	-1.07862	TRUE
MDC	6367	O00626	119.635	153.559	-0.357515	TRUE	96.3709	152	-0.651969	TRUE
Oncostatin M	5008	P13725	571.448	1029.75	-0.848479	TRUE	571.448	1029.75	-0.848479	TRUE
PDGF BB	5155	P01127	1257.27	598.5	1.06961	TRUE	1257.27	598.5	1.06961	TRUE
TGF- β1	7040	P01137	417.254	758.5	-0.86067	TRUE	417.254	758.5	-0.86067	TRUE
TNF-α	7124	P01375	890.34	1678.08	-0.91362	TRUE	542.642	1599.25	-1.55757	TRUE
TNF-β	4049	P01374	206.236	490.7	-1.24651	TRUE	226.207	496.5	-1.13069	TRUE
