# Supplementary material for: Targeting myeloid derived suppressor cells reverts immune suppression and sensitizes BRAF-mutant papillary thyroid cancer to MAPK inhibitors
Source: Nat Commun. 2022 Mar 24;13:1588. doi: 10.1038/s41467-022-29000-5 (PMC8948260; doi:10.1038/s41467-022-29000-5)
Supplement: Supplementary file 6 — Supplementary Data 3 [file 41467_2022_29000_MOESM6_ESM.xlsx]

## Sheet: Supplementary Table 3
down-regulated genes in K1 cells	up-regulated genes in 21NT cells	overlapped genes
A4GNT	AADAT	ABI3BP
ABCA6	AAED1	APCDD1L
ABCB1	AAMP	AREG
ABCC9	AARD	ASB9
ABCG2	AARSD1	ASIC2
ABHD12B	AASDHPPT	C8orf46
ABHD14B	AASS	COL11A1
ABHD15	ABCA13	COL14A1
ABI3BP	ABCG2	COL19A1
ABO	ABI3BP	CSF2
ABRACL	ACACB	CSMD3
ACADS	ACAT1	CXCL3
ACE	ACOT4	CXCL8
ACOD1	ACOX2	ELFN1
ACSL6	ACP5	EPHA6
ACSS3	ACP6	EREG
ACTR1A	ACTL8	EXO5
ADAMTS14	ACTN2	F13A1
ADCK4	ACTR3	FAM198B
ADD1	ACTRT3	FAM212A
ADGRL3	ACVR1	FAM86B1
ADH4	ACVR1C	FMN2
ADPRH	ADAM28	GAP43
ADPRHL1	ADAMTS1	GJA1
ADRA2A	ADAMTS6	GPC4
ADRB1	ADAP2	IL7R
AFF2	ADD2	KRTAP2-3
AFP	ADGRE5	LAMC2
AGMO	ADPRH	LRRN2
AGR2	ADRA1B	MYL9
AHRR	ADRM1	NRG1
AIF1L	ADSL	PDE3B
AIM2	AEN	PKP1
AK3	AFAP1L2	POU3F2
AKR1B10	AGAP2-AS1	RPL22L1
AKR1C2	AGPAT4	SAMD5
ALDH1A1	AGPS	SLC10A4
ALDH1L1	AIFM2	SLITRK4
ALDH2	AKAP2	SOCS2
ALX1	ALDH1B1	SYT16
AMBP	ALG1L9P	TBX3
ANGPT1	ALKBH8	TLR2
ANGPTL3	ALOX5AP	TUB
ANK3	ALOXE3	TXNIP
ANKRD20A1	AMMECR1L	VANGL2
ANKRD45	ANAPC4	ZNF385B
ANKRD7	ANGPTL4	ABCG2
ANO5	ANKAR	ADPRH
ANO9	ANKLE1	ANTXR2
ANTXR2	ANKRD13B	ARRDC4
ANXA10	ANKRD16	BIN1
ANXA8	ANKRD18A	C15orf48
AOC1	ANKRD18B	C2orf69
AP3S2	ANKRD2	CCL20
APAF1	ANKRD33B	CX3CL1
APCDD1	ANKRD36	CXCL1
APCDD1L	ANKRD36C	CXCL2
APOA5	ANKRD39	CXCL5
APOL6	ANKRD6	GOLGA8K
ARC	ANO1	HOXA13
AREG	ANTXR2	ICAM3
ARHGAP25	ANXA3	ILKAP
ARL10	ANXA6	ITGB6
ARL13B	AOX1	MOB3B
ARMCX5-GPRASP2	AP1S2	NDUFAF4
ARNT2	AP1S3	OVOL1
ARRDC4	APCDD1L	PAPSS2
ASAH2	APCDD1L-AS1	PLA2G4F
ASAP3	APLN	PPIF
ASB9	APOBEC3H	RIN1
ASCL2	AR	SERF1A
ASIC2	AREG	SLC7A11
ASIC5	ARHGAP22	STEAP1
ASMTL	ARHGAP31-AS1	TFR2
ASPN	ARHGEF2	TRIM36
ASS1	ARHGEF26	WNT10B
ASTN1	ARHGEF40
ASXL3	ARID5A
ATG7	ARL14
ATP2B2	ARL15
ATP2B4	ARL4C
ATP6AP1	ARL5A
ATP6V1G2	ARL6IP6
BAALC	ARNTL2
BANK1	ARPC2
BBOX1	ARRDC4
BCAM	ART4
BCHE	ASB1
BDH2	ASB9
BFSP1	ASIC2
BIN1	ASNSD1
BMP10	ASPHD1
BMP4	ASPHD2
BOLA2	ATAD3B
BOLA2B	ATF5
BPIFB1	ATG16L1
BRD3	ATIC
BRINP1	ATL1
C10orf90	ATP1A3
C14orf169	ATP5G3
C15orf48	ATP6V1B1-AS1
C15orf59	AURKAPS1
C16orf74	AURKB
C18orf65	AXL
C19orf60	B3GALNT1
C1orf116	B3GALT5
C1orf189	B3GLCT
C1QTNF1	B3GNT4
C1QTNF9B	BAG2
C1QTNF9B-AS1	BARD1
C1R	BARX1
C2orf69	BATF3
C2orf72	BBS5
C3	BCAS4
C3orf18	BCL11A
C3orf58	BCRP2
C4B	BCS1L
C5orf46	BEST3
C7orf60	BHLHA15
C7orf71	BIN1
C8A	BIRC2
C8orf46	BLMH
C9orf116	BOK
CACNA1C	BOP1
CACNB3	BTG3
CACNG4	BUB1
CADM1	BUB1B-PAK6
CAPG	BVES
CAPN5	BYSL
CARD14	C10orf67
CAV3	C10orf95
CCDC109B	C11orf68
CCDC110	C12orf45
CCDC152	C15orf48
CCDC166	C1GALT1C1L
CCDC170	C1orf115
CCDC183-AS1	C2orf15
CCDC40	C2orf47
CCDC64B	C2orf69
CCDC80	C2orf82
CCDC88B	C3orf52
CCL2	C4orf19
CCL20	C5orf30
CCNG2	C8orf46
CCNJL	C8orf58
CCNYL1	C9orf47
CCR1	CA13
CCR10	CA8
CD200	CABP1
CD226	CACNA2D1
CD24	CACNB4
CD44	CACYBP
CD55	CALB1
CDC25B	CALB2
CDH3	CALCRL
CDK5RAP1	CALD1
CDKN3	CAMK2N2
CEACAM1	CAMKK1
CELF5	CAPSL
CFAP221	CARD10
CFH	CARD8-AS1
CFHR1	CASC2
CGNL1	CBR3
CH25H	CBX3
CHAC1	CC2D2A
CHFR	CCDC112
CHI3L2	CCDC122
CHMP7	CCDC138
CHRM3	CCDC51
CHRNA1	CCDC58
CHST1	CCDC68
CHST9	CCDC86
CIDEB	CCK
CKLF	CCL20
CKS2	CCL5
CLDN20	CCM2
CLEC3B	CCND1
CLIC4	CCNE1
CMA1	CCNH
CMTR1	CCT3
COL11A1	CD274
COL14A1	CD300C
COL19A1	CD302
COL2A1	CD3EAP
COL6A3	CD74
COL6A6	CD83
COL8A1	CD8A
COMMD7	CDC25A
CORO1A	CDC42SE1
COX6B2	CDCA4
CP	CDCA7
CPA6	CDK15
CPE	CDK5R1
CPEB4	CDKL1
CRB1	CDKN2AIPNL
CRB3	CENPL
CREB3L2	CEP112
CRIP1	CES1
CRYBB3	CES1P2
CSF1	CFAP46
CSF2	CHAC2
CSGALNACT1	CHCHD10
CSMD3	CHCHD5
CTAGE9	CHCHD7
CTDSP1	CHD1L
CTNNBIP1	CHEK1
CTRB1	CHMP6
CX3CL1	CHORDC1
CXADR	CHRNA5
CXCL1	CHST10
CXCL2	CHST4
CXCL3	CHSY3
CXCL5	CIAO1
CXCL6	CIB2
CXCL8	CIITA
CXCR5	CISD2
CXXC5	CKS1B
CYB5R2	CLCF1
CYP19A1	CLEC2B
CYP1B1	CLIC1
CYP26B1	CLTB
CYP2B6	CMBL
CYP3A7-CYP3A51P	CMSS1
DAPK1	CMTM7
DAZL	CNPPD1
DCHS2	CNTF
DCLK2	COL11A1
DCN	COL13A1
DCP2	COL14A1
DDIT4	COL17A1
DDX43	COL19A1
DEF6	COL1A1
DEFB109B	COL4A3
DEFB126	COL4A4
DEFB131B	COL5A2
DEFB132	COL6A2
DENND1B	COL7A1
DHCR7	COPS8
DHRS11	CORO7
DLL1	CPS1
DLL4	CPZ
DLX4	CRACR2A
DMBT1	CREB3L1
DMTN	CREB5
DNAH7	CRISP3
DNAJC5	CRISPLD1
DNALI1	CRLF1
DOK7	CRYBA2
DRD3	CRYM-AS1
DSC2	CSF2
DSEL	CSF2RA
DTD1	CSMD3
DUOX2	CSPG5
DUSP3	CSRNP1
DUSP4	CSTA
DUXAP10	CSTF2
DYNLRB1	CTNNAL1
DYNLRB2	CTPS1
DZIP3	CTRL
EDIL3	CTSC
EEF1A2	CTSZ
EEF1E1-BLOC1S5	CWC22
EFEMP1	CX3CL1
EFNB3	CXCL1
EGF	CXCL2
EGFL7	CXCL3
EGLN3	CXCL5
ELFN1	CXCL8
ELMOD1	CXCR1
ELOVL7	CXCR4
EMID1	CXorf57
ENPP2	CYCS
EPAS1	CYGB
EPCAM	CYP20A1
EPHA4	CYP24A1
EPHA6	CYP27B1
EPHB3	CYP2J2
EPN3	CYP2S1
EPPK1	CYP4V2
EPS8	CYP7B1
ERCC5	CYR61
EREG	CYTH4
ERGIC2	DACH1
ERICH6	DAPP1
ERO1A	DAW1
ESPN	DBN1
ESPNL	DBNDD2
ETNK1	DCTPP1
ETNK2	DCUN1D4
EVX1	DCUN1D5
EXO5	DDIAS
EXTL2	DDN
F13A1	DDX10
F5	DDX18
FAAH2	DDX56
FAHD2A	DEGS1
FAM102A	DENND2A
FAM102B	DFNA5
FAM122C	DGCR11
FAM133A	DGKD
FAM138E	DGKG
FAM13C	DHRS9
FAM151A	DIMT1
FAM174A	DIP2C
FAM189A1	DISP2
FAM198B	DKC1
FAM212A	DKK3
FAM43B	DLEU1
FAM46A	DLGAP1
FAM72D	DLL3
FAM74A7	DLX1
FAM84A	DLX2
FAM84B	DMD
FAM86B1	DMRT1
FAT2	DNAH17
FBLN2	DNAJC10
FDCSP	DNAJC15
FER1L6	DNAJC9
FFAR4	DNER
FGF7	DNMBP
FGFBP1	DNPEP
FGFR1	DOCK10
FGFR3	DOK1
FIBIN	DPY19L1P2
FKBP11	DPY19L2
FLJ20712	DPY19L2P1
FMN2	DRAP1
FOXE3	DSCC1
FOXG1	DTD2
FOXP2	DTNA
FOXRED2	DTYMK
FPR1	DUBR
FSBP	DUSP12
FSTL5	DUSP2
FXYD3	DUSP5P1
FXYD6	DUSP7
FYB1	DUSP9
FZD1	DYNC1I2
FZD4	DYX1C1-CCPG1
GAB2	DZIP1L
GABRA3	E2F5
GABRG1	EAF2
GAGE12E	EDA
GAGE12F	EDNRA
GALNT10	EDNRB
GALNT15	EEF1AKMT1
GALNT4	EEF1B2
GALNT5	EEF2KMT
GALNT9	EEPD1
GALNTL6	EFHD1
GAP43	EFHD2
GATA3	EFR3B
GBP2	EGR4
GBP4	EHD1
GCDH	EHD4
GCG	EIF3J
GDF6	EIF4E2
GIF	EIF5A2
GJA1	EIF5B
GJB2	ELFN1
GJB7	ELFN1-AS1
GLIPR1L2	EMB
GLRX2	EMG1
GMNC	EML1
GNG8	EN1
GOLGA6L1	ENG
GOLGA8B	ENOX1
GOLGA8H	ENPP1
GOLGA8K	EOGT
GOLGA8O	EPB41L3
GPC4	EPDR1
GPM6A	EPGN
GPR141	EPHA10
GPR160	EPHA6
GPR35	EPHX3
GPR65	EPN2
GPR84	ERAL1
GPR88	ERCC1
GPSM1	ERCC3
GPX2	EREG
GRAMD1C	ERICH2
GRIK2	ERVMER34-1
GRIN2B	ETS1
GSTT2	ETV1
GTF2F2	ETV5
GTF2H2	EVA1A
GTF2IP1	EVA1B
GTPBP6	EVA1C
GUCY2D	EXO1
GYPC	EXO5
H19	EXOG
HAS1	EXOSC4
HCFC1R1	EXOSC8
HECW1	EXOSC9
HEPHL1	EYA2
HES4	F13A1
HEXDC	F2RL1
HEY2	FABP5
HINT3	FABP6
HIST1H4H	FADD
HIST1H4K	FAM101B
HIST2H2AA3	FAM105A
HIST2H3PS2	FAM109B
HIST2H4A	FAM126A
HLA-B	FAM149A
HLA-DRB5	FAM172BP
HMCN1	FAM175A
HNRNPLL	FAM184A
HORMAD2	FAM189A2
HOTAIRM1	FAM198B
HOTS	FAM212A
HOXA1	FAM222B
HOXA10	FAM226A
HOXA10-AS	FAM226B
HOXA13	FAM24B
HOXB2	FAM46B
HOXB-AS1	FAM58A
HOXC11	FAM81A
HPGD	FAM86B1
HPX	FAM86B2
HR	FAM86C1
HS1BP3	FAM86JP
HSD17B3	FAM89A
HSF4	FAM95C
HSPB9	FARSB
HSPE1-MOB4	FASTKD1
HTD2	FASTKD2
ICAM3	FBXO17
IDH2	FCRLB
IFI35	FEN1
IFI44	FERMT1
IFITM1	FEZ2
IFITM10	FEZF1-AS1
IFITM2	FGF5
IGF2	FHL2
IGFBP4	FIGNL1
IGFBP5	FIP1L1
IGSF1	FJX1
IKZF2	FKBP14
IL10	FKBP9P1
IL12RB1	FMN2
IL17RC	FMNL3
IL19	FMO3
IL1RL1	FOSL1
IL36G	FOXD1
IL36RN	FRMD3
IL7R	FRMD5
ILKAP	FSCN1
INHBA	FSD1
IRAK4	FSD1L
IRF8	FSIP2
IRGM	FSTL3
ITGA11	FSTL4
ITGB5	FTCDNL1
ITGB6	FUS
ITGB8	FUT4
ITPKB	FZD7
JDP2	G0S2
KCND2	GAD1
KCNJ12	GAL
KCNJ16	GALNT18
KCNJ2	GAP43
KCNJ4	GAR1
KCNJ5	GAREM2
KCNK2	GAS2L1
KCNN3	GAS7
KCNQ1	GBAT2
KCNT2	GBX2
KCTD10	GCA
KCTD4	GDAP1
KIAA0319	GDI2
KIF16B	GEM
KIF26A	GEMIN5
KLF12	GEMIN6
KLHDC8B	GFAP
KLK10	GFPT2
KMO	GGT3P
KRT23	GINS2
KRTAP2-3	GINS4
LACC1	GJA1
LAMA5	GJB3
LAMC2	GJC1
LANCL3	GLDC
LBX2-AS1	GLMN
LCMT1	GLS
LCN2	GMPPA
LCT	GNA15
LGALS4	GNAS
LHFPL2	GNG11
LHPP	GNG2
LHX6	GOLGA7B
LHX9	GOLGA8K
LIN7C	GPA33
LINC00211	GPAT3
LINC00958	GPAT4
LINC01224	GPATCH4
LINC01585	GPC4
LINGO2	GPHA2
LIPA	GPM6B
LIPC	GPR161
LIPG	GPR3
LMAN1	GPR39
LOC100101148	GPR4
LOC100288152	GPR63
LOC100630923	GPR68
LOC101929524	GPR87
LOC105378260	GPRIN1
LOC107984817	GRAMD1B
LOC107984859	GRAP
LOC107984876	GRB10
LOC107985103	GRB14
LOC107985410	GRK5
LOC112268119	GRPEL1
LOC112268260	GRPR
LOC112268444	GTF2H2C_2
LOC112268453	GTPBP4
LOC388436	GTPBP8
LPAR1	GUCY1A3
LPAR4	HAO1
LPAR5	HARS
LRRC2	HAS3
LRRC47	HAT1
LRRC63	HAUS8
LRRC70	HBEGF
LRRK2	HECW2
LRRN1	HELLS
LRRN2	HES7
LRRN3	HIBCH
LRTM1	HIC1
LSMEM2	HIST1H2BB
LTBP1	HJURP
LUM	HLA-DMB
LY96	HLA-DPA1
MAF	HLA-DPB1
MAGEB6	HLA-DQA2
MAGED4B	HLA-DQB1
MAJIN	HLA-DRA
MAML2	HLA-DRB1
MAP1LC3B	HLX
MAP2	HMBS
MARCKSL1	HMGN5
MAST3	HMOX2
MBLAC2	HN1
MDK	HNMT
MEF2BNB-MEF2B	HOXA10-HOXA9
MEF2C	HOXA11
MEFV	HOXA13
MEGF6	HOXA5
MERTK	HOXA-AS2
METTL23	HOXB9
MGAM	HS6ST2
MGARP	HSD3B7
MGST1	HSPA12A
MGST2	HSPA8
MILR1	HSPB8
MIR1181	HSPD1
MLXIP	HSPE1
MLYCD	HTR1D
MMGT1	HTR1F
MMP7	HYI
MOB3B	ICAM3
MOV10L1	ID3
MR1	IFFO2
MRM1	IFNLR1
MT1F	IFT46
MTNR1B	IGF2BP3
MUC13	IGSF9B
MUC2	IKBIP
MUC5AC	IKBKE
MUC5B	IL11
MUSK	IL12A
MYB	IL15RA
MYCL	IL17RB
MYCN	IL22RA1
MYL9	IL23A
MYOM1	IL31RA
MYPN	IL6
MYRIP	IL7
NACC2	IL7R
NAPSA	ILF2
NAT2	ILKAP
NATD1	IMP4
NCMAP	ING5
NCR1	INHBB
NDN	INPP4A
NDNF	INPP5A
NDUFAF4	INPP5D
NEURL1B	INSIG2
NFASC	IRAK2
NHLRC1	ISOC1
NID2	ITGA10
NIM1K	ITGA4
NINJ2	ITGA6
NIPAL3	ITGB6
NKD1	ITM2C
NME3	ITPKA
NMNAT2	IWS1
NNMT	JAZF1
NOD2	JPH1
NOX4	JUN
NOX5	KATNAL1
NOXO1	KAZN
NPIPA2	KBTBD8
NPIPA8	KCNF1
NPNT	KCNG1
NR2E1	KCNJ15
NR4A3	KCNMA1
NR5A2	KCTD8
NRBP2	KDELC2
NRG1	KDM4A-AS1
NRK	KHDRBS3
NT5C1B	KHK
NTRK2	KIAA1211
NUCB1	KIAA1324
NUPR1	KIAA1549L
NYNRIN	KIAA1715
OGDHL	KIRREL
OLFML3	KLB
OMD	KLF10
OPLAH	KLF14
OPN5	KLF16
OPRK1	KLF2
OR10A4	KLHL23
OR1J1	KLHL3
OR1J2	KRT5
OR4F13P	KRT75
OR4F15	KRTAP2-3
OR4F4	L3HYPDH
OSR1	LAD1
OSR2	LAMB3
OTOGL	LAMB4
OTUD5	LAMC2
OVOL1	LANCL1
OXTR	LANCL2
PAPSS2	LCAT
PARM1	LCP1
PATE3	LEF1
PBXIP1	LHFP
PCBP3	LIF
PCDH11X	LIMD2
PCDHA10	LIMS2
PCDHA13	LINC00052
PCDHGA3	LINC00116
PCP4	LINC00152
PDE3B	LINC00242
PDE6C	LINC00341
PDGFRB	LINC00473
PDGFRL	LINC00639
PDIA2	LINC00704
PDK4	LINC00707
PDSS2	LINC00857
PDZK1IP1	LINC00886
PEAK1	LINC00911
PGBD3	LINC01096
PGM5	LINC01116
PHEX	LINC01117
PHGR1	LINC01128
PHYHD1	LINC01260
PIAS4	LINC01351
PIF1	LINC01363
PIGR	LINC01444
PIK3R1	LINC01602
PIP5K1B	LMAN2L
PITPNM2	LMCD1
PITX2	LMNA
PKNOX2	LOC100128317
PKP1	LOC100422556
PLA2G4F	LOC100505549
PLAGL1	LOC100505920
PLB1	LOC100506178
PLBD1	LOC100506860
PLCL1	LOC100507431
PLEKHA4	LOC100996286
PLEKHB1	LOC100996579
PLEKHJ1	LOC101060542
PLGLB1	LOC101927027
PLXNA2	LOC101927391
PLXNA4	LOC101927497
PNPLA1	LOC101927571
POMK	LOC101927746
POU2AF1	LOC101927795
POU3F1	LOC101927934
POU3F2	LOC101928820
PPARG	LOC101929574
PPFIA2	LOC102723373
PPIF	LOC102724094
PPP1R1A	LOC102724434
PPT2-EGFL8	LOC103021295
PRMT6	LOC105375401
PRMT8	LOC105376382
PRPH2	LOC150776
PRR16	LOC152225
PRSS1	LOC257396
PRSS2	LOC389831
PRSS35	LOC399815
PSMA6	LOC645166
PSMB8	LOC728392
PSMB8-AS1	LOC729683
PSMB9	LOC79160
PTGFR	LONRF2
PTK2B	LOXL3
PTK7	LPAR3
PTPN6	LRP4
PTPRT	LRR1
RAB10	LRRC3
RAB28	LRRC66
RAB36	LRRC8C
RAB3C	LRRIQ3
RAB43	LRRN2
RAD51AP2	LRRN4
RAD51L3-RFFL	LRRN4CL
RALGPS2	LRWD1
RANBP3L	LSM10
RARG	LST1
RARRES2	LTB
RASL10B	LTBP2
RBAK-RBAKDN	LY6K
RBP2	LY75-CD302
REG4	LYAR
REPS2	LYN
RET	LYPD1
RFPL3	LYPD6
RGS6	LYSMD2
RHEX	MACROD2
RHOU	MAGEE1
RHPN1	MALL
RIBC2	MALSU1
RILP	MAP3K14
RIMBP3	MAP4K4
RIMBP3C	MAP6D1
RIMS1	MAP7D1
RIMS3	MAPRE2
RIN1	MARK1
RMI2	MARS2
RNF133	MAST1
RNF170	MATK
RNF175	MATN3
RNF180	MB21D1
RNF208	MB21D2
ROBO2	MCAM
RORB	MCF2
RPGRIP1	MCM10
RPL17-C18orf32	MCM6
RPL22L1	MCTP2
RPS6KA2	MDFI
RSPH1	MED31
RTL3	METAP1D
RTL8B	METTL1
RTN3	METTL21A
RTP4	METTL5
RUBCNL	METTL8
RYK	MEX3A
RYR2	MFAP2
S100A5	MFSD13A
S100P	MFSD9
SAA1	MGAT5
SAA2	MICB
SACM1L	MIR100HG
SAMD14	MIR4435-2HG
SAMD5	MIR4697HG
SAMD9	MIR503HG
SAP18	MIR9-3HG
SCARF2	MISP
SCG5	MITF
SCN3B	MKRN2OS
SCRG1	MLKL
SCT	MLLT11
SEBOX	MLNR
SECTM1	MMADHC
SELENBP1	MMP14
SEMA3C	MNS1
SEMA3E	MOB3B
SEMA3F	MOB4
SEMA4C	MOCS1
SERF1A	MON1A
SERINC5	MPP1
SERPINA1	MPP3
SESN2	MPP6
SESN3	MREG
SEZ6L2	MRPL1
SGIP1	MRPL15
SGPL1	MRPL21
SGPP2	MRPL24
SH2D1A	MRPL30
SH3BGR	MRPL32
SH3PXD2A	MRPL44
SHANK2	MRPL45P2
SHANK3	MRPL9
SHC4	MRPS24
SIPA1	MRPS5
SKAP1	MRPS6
SKOR1	MRPS9
SLAMF7	MRTO4
SLC10A4	MSANTD3
SLC12A2	MSANTD4
SLC14A1	MT1E
SLC16A6	MTHFD2L
SLC1A4	MTMR6
SLC22A23	MTSS1
SLC25A29	MTX2
SLC26A7	MUC12
SLC26A8	MUC19
SLC2A4	MX2
SLC2A5	MXRA7
SLC35F4	MYADM
SLC38A10	MYBL1
SLC40A1	MYEOV
SLC44A3	MYH15
SLC45A3	MYL9
SLC4A4	MYO7B
SLC5A10	NAAA
SLC7A11	NAB1
SLC7A2	NAT16
SLC7A9	NCAPH
SLC9A3	NCEH1
SLCO4C1	NCF2
SLIT2	NCK2
SLITRK4	NCL
SLX1A	NCOR1P1
SLX1B	NCS1
SMCO3	NDUFAF4
SMG1P6	NDUFAF6
SMIM11B	NDUFB3
SMIM18	NEGR1
SMIM20	NEK3
SMPX	NELFCD
SNPH	NEMP2
SNRPB2	NES
SNX15	NET1
SOAT1	NF2
SOBP	NFATC1
SOCS2	NFE2L2
SOWAHD	NFE2L3
SOX10	NFKB2
SOX13	NFKBIE
SOX30	NGEF
SPANXN1	NGF
SPANXN4	NHEJ1
SPATA5L1	NHLH2
SPDYE17	NIFK
SPDYE2B	NIP7
SPIRE2	NIPAL1
SPTLC3	NIPAL4
SQRDL	NKAIN2
SRGAP2C	NKD2
SRGAP3	NKILA
SRL	NLE1
SSPO	NLN
SSUH2	NLRP1
ST20-MTHFS	NMI
ST3GAL1	NOCT
ST8SIA4	NOG
STAG3L1	NOL4
STAT5A	NOL9
STEAP1	NOP16
STXBP6	NOP2
SYNPO2	NOP56
SYT12	NOP58
SYT16	NOSTRIN
SYTL2	NPAS2
TAL2	NPM1
TAPBP	NPTXR
TAS2R31	NR2C2AP
TAS2R4	NR2E3
TBC1D16	NRG1
TBC1D22A	NRIP3
TBC1D3F	NT5C3A
TBC1D3L	NT5E
TBX20	NTN1
TBX3	NTSR1
TCEANC	NUDT11
TCN2	NUDT15
TCP11L2	NUFIP1
TECTA	NUFIP2
TENM1	NUP35
TERB1	NUP88
TEX19	NUPL2
TEX46	NXPE3
TFEC	NXPH3
TFR2	OASL
TGFB2	OCIAD2
TGFBR3	ODC1
TGM2	OLA1
THBS1	OR51I1
THEGL	ORC1
THPO	ORC6
THRB	ORMDL1
TIGIT	OSBPL6
TJP3	OVOL1
TLR2	P2RX5
TMC1	P2RX5-TAX1BP3
TMC4	P2RY2
TMED7-TICAM2	PAG1
TMEM100	PAGR1
TMEM101	PAK1
TMEM105	PALLD
TMEM110-MUSTN1	PAPSS2
TMEM150A	PARD6G
TMEM163	PART1
TMEM178B	PARVB
TMEM182	PAX5
TMEM216	PAX8
TMEM229B	PAX8-AS1
TMEM231	PBDC1
TMEM253	PBX3
TMEM256	PCBD2
TMEM26	PCBP4
TMEM272	PCDH10
TMEM47	PCDH15
TMEM60	PCDHA9
TMEM65	PDCD2L
TMPRSS15	PDCL3
TMPRSS2	PDCL3P4
TNC	PDE10A
TNFAIP2	PDE3B
TNFAIP6	PDE7B
TNIP3	PDGFA
TNK1	PDGFB
TNS1	PDLIM2
TOX2	PDLIM3
TPTE	PDLIM7
TRDC	PDSS1
TRERF1	PDZD4
TRIM31	PEA15
TRIM36	PEAR1
TRPC6	PECR
TRPM3	PFDN2
TSLP	PFKP
TSPAN1	PGBD1
TSPAN13	PGF
TSPOAP1	PHOSPHO2
TSPYL1	PIGH
TTC19	PIK3AP1
TTC29	PINLYP
TUB	PINX1
TVP23C-CDRT4	PIP5K1A
TXNIP	PITPNC1
U2AF1	PITRM1
UBE2D1	PKHD1L1
UBE2L6	PKIA
UGT3A2	PKMYT1
UNC13A	PKP1
UNC5B	PLA2G4A
UPK3BL	PLA2G4F
UPP2	PLA2R1
URGCP-MRPS24	PLAC8
USP12	PLAT
USP2	PLAU
UXS1	PLAUR
VAMP8	PLCG1-AS1
VANGL1	PLCH2
VANGL2	PLD5
VAX2	PLEK2
VCAM1	PLEKHG1
VGLL4	PLEKHG4B
VILL	PLEKHG5
VMA21	PLEKHO1
VPS26A	PLSCR3
VSNL1	PMEPA1
WBP1L	PMP22
WDR82	PMS1
WDR93	PNLIPRP3
WISP1	PNMA2
WNT10B	PNMA6A
WNT5A	PNP
WNT5B	POC5
WNT7B	POLA2
YIPF4	POLB
ZBBX	POLDIP2
ZBED3	POLE2
ZBTB10	POLE4
ZBTB32	POLM
ZBTB42	POLR1B
ZCCHC23	POLR1E
ZFP14	POLR2D
ZFPM1	POLR3G
ZIC2	POP1
ZMAT5	POU3F2
ZNF10	PPIA
ZNF140	PPIAL4C
ZNF141	PPIF
ZNF160	PPP1R1C
ZNF254	PPP1R26-AS1
ZNF385B	PPP2R2C
ZNF43	PPP3CB
ZNF431	PPP4R4
ZNF486	PRAC2
ZNF518A	PRDM12
ZNF521	PRELID3A
ZNF525	PRICKLE3
ZNF529	PRKAB2
ZNF567	PRKAR1B
ZNF569	PRKCDBP
ZNF570	PRKX
ZNF580	PRLR
ZNF607	PROCR
ZNF611	PRPF6
ZNF682	PRPS1
ZNF705E	PRR36
ZNF709	PRR7-AS1
ZNF80	PRSS23
ZNF816	PSMD1
ZNF845	PSMD14
ZNF91	PSMD4
	PSMG1
	PTGES3L-AARSD1
	PTHLH
	PTN
	PTRH2
	PTTG1
	PTTG2
	PTX3
	PUS7
	PUS7L
	PVRL3
	PWP1
	PWP2
	PXDN
	PYCR1
	QDPR
	RAB22A
	RAB38
	RAB3B
	RABEPK
	RABIF
	RAD51
	RAE1
	RAI2
	RALA
	RALB
	RAMP1
	RANBP1
	RAPGEF5
	RASL10A
	RASL11B
	RASSF5
	RBFA
	RBM17
	RBM24
	RBM3
	RBM45
	RBM8A
	RBPMS2
	RCAN3
	RDH16
	REEP1
	RELB
	RERG
	REXO2
	RFC3
	RFTN1
	RFX2
	RGMB-AS1
	RGS10
	RGS14
	RGS16
	RGS19
	RGS2
	RGS20
	RGS7
	RHOBTB1
	RIN1
	RIPPLY2
	RLTPR
	RNASEH2B
	RNF126
	RNF128
	RNF144A
	RNF149
	RNF2
	RNF216P1
	RNF25
	RNMTL1
	ROBO3
	ROBO4
	ROR2
	RP9
	RPE
	RPEL1
	RPGR
	RPIA
	RPL22L1
	RPL23A
	RPL23AP7
	RPP25
	RPRML
	RPS6KA2-IT1
	RPS6KA4
	RQCD1
	RRAD
	RRM2
	RRP15
	RRP9
	RRS1
	RSAD2
	RTKN
	RUSC1
	S100A2
	S100A3
	S1PR1
	SAA2-SAA4
	SAAL1
	SAC3D1
	SACS
	SAMD10
	SAMD5
	SATB2-AS1
	SCG2
	SCHIP1
	SCRN3
	SDC2
	SDF2
	SEMA7A
	SERF1A
	SERF1B
	SERPINA5
	SERPINB7
	SERPINB8
	SERPINE1
	SERTAD1
	SETD9
	SETMAR
	SF3B4
	SFN
	SFR1
	SFRP1
	SFXN4
	SGCB
	SGK3
	SGMS1
	SGOL2
	SGTB
	SH2B3
	SH2D2A
	SH3BGRL
	SH3BP4
	SH3KBP1
	SH3PXD2A-AS1
	SH3PXD2B
	SHOX2
	SHQ1
	SKA1
	SKA3
	SLC10A4
	SLC16A10
	SLC16A9
	SLC19A3
	SLC25A12
	SLC25A15
	SLC25A19
	SLC25A30
	SLC26A2
	SLC29A1
	SLC35E4
	SLC35F2
	SLC35F3
	SLC35G1
	SLC35G2
	SLC43A3
	SLC46A1
	SLC4A3
	SLC5A2
	SLC5A6
	SLC6A2
	SLC7A11
	SLC9A2
	SLCO2A1
	SLCO4A1-AS1
	SLCO5A1
	SLFN11
	SLITRK4
	SMAD7
	SMARCAL1
	SMIM6
	SMN2
	SMO
	SMPD4
	SMTN
	SNAI2
	SNHG1
	SNHG15
	SNORA3B
	SNORA64
	SNORA73B
	SNORD15B
	SNORD35A
	SNTB1
	SNX10
	SOCS2
	SORD
	SOWAHC
	SOX11
	SOX15
	SOX18
	SPA17
	SPACA4
	SPAG1
	SPAG5
	SPANXB1
	SPANXC
	SPATA2L
	SPATA3-AS1
	SPATS2L
	SPC25
	SPDL1
	SPHK1
	SPR
	SPRY4
	SPRYD7
	SPTA1
	SPTB
	SPTBN5
	SPTY2D1-AS1
	SRM
	SRPX
	SRRD
	SSB
	STAM2
	STAMBPL1
	STARD7
	STEAP1
	STEAP3
	STK17A
	STK25
	STMN3
	STRADB
	STX17-AS1
	STX1A
	STX2
	STYK1
	SUGT1
	SULF2
	SUSD5
	SVIL-AS1
	SVIP
	SYCP2
	SYK
	SYT16
	SYT9
	SYTL3
	TAF9
	TAGLN2
	TAGLN3
	TBRG4
	TBX3
	TCEAL1
	TCOF1
	TCP11
	TDRP
	TEAD4
	TEX29
	TEX30
	TFR2
	THAP4
	THG1L
	THOC5
	THSD1
	THYN1
	TICAM1
	TIFA
	TIMM17A
	TIMM8A
	TIPIN
	TLL1
	TLR2
	TM4SF18
	TMC3-AS1
	TMED6
	TMEM14A
	TMEM173
	TMEM177
	TMEM185B
	TMEM199
	TMEM200A
	TMEM200B
	TMEM25
	TMEM265
	TMEM39B
	TMEM52
	TMEM74
	TMEM97
	TMEM98
	TMPRSS11E
	TMTC1
	TNF
	TNFAIP1
	TNFAIP8L2
	TNFRSF10A
	TNFRSF10B
	TNFRSF1B
	TNFSF15
	TNIP1
	TOP1MT
	TP53I13
	TPD52L2
	TPK1
	TPM3
	TRAPPC4
	TRG-AS1
	TRIM16
	TRIM16L
	TRIM36
	TRIM47
	TRIM58
	TRIM61
	TRIM7
	TRIP6
	TRMT6
	TRNP1
	TRPA1
	TRPM2
	TRPV2
	TSN
	TSPAN2
	TSPAN5
	TSPYL5
	TTC21B
	TTC27
	TTL
	TTLL11
	TTLL4
	TTPA
	TUB
	TUBA1B
	TUBA1C
	TUBA4A
	TUBB2A
	TUBB3
	TUBB6
	TUBB8
	TUFT1
	TWF2
	TWISTNB
	TXNDC9
	TXNIP
	TYRP1
	TYW5
	UAP1
	UBASH3B
	UBE2D4
	UBE2E3
	UBE2E4P
	UBE2S
	UBE2T
	UBIAD1
	UCHL1
	UCK2
	UGT8
	ULBP3
	UMPS
	UNC119
	UNC13B
	USP2-AS1
	USP43
	USP54
	UTP14A
	UTP15
	UTP4
	VANGL2
	VAPB
	VDAC3
	VDR
	VEGFC
	VIL1
	VIM
	VOPP1
	VRK2
	VSIG1
	VSTM1
	WDR12
	WDR4
	WDR41
	WDR74
	WDR75
	WDR77
	WDSUB1
	WIPF1
	WIPF3
	WNK2
	WNT10B
	WNT11
	WNT7A
	WTIP
	WWC1
	XAGE2
	XK
	XRCC5
	YAE1D1
	YWHAH
	ZBED1
	ZBED2
	ZC3H15
	ZC3H8
	ZC4H2
	ZDHHC23
	ZFAND2A
	ZNF124
	ZNF280C
	ZNF296
	ZNF365
	ZNF385B
	ZNF511
	ZNF512B
	ZNF517
	ZNF587B
	ZNF618
	ZNF697
	ZNF711
	ZSWIM5
	ZWINT
